# Supplementary material for: Promoter tools for further development of Aspergillus oryzae as a platform for fungal secondary metabolite production
Source: Fungal Biol Biotechnol. 2020 Mar 23;7:3. doi: 10.1186/s40694-020-00093-1 (PMC7092444; doi:10.1186/s40694-020-00093-1)
Supplement: Supplementary file 1 — Additional file 1: Table S1. Genes listed in order of the median of expression ranks in 83 transcriptome datasets. Table S2. The two nucleotide sequences confirmed to have promoter activities in this study. Table S3. Median of ranks and expression rank of top 13 genes in Table 1 evaluated from 83, 75 and 8 transcriptome datasets. Table S4. Primers for construction of transformants. [file 40694_2020_93_MOESM1_ESM.xlsx]

## Sheet: Table S1
Table S1. Genes listed in order of the median of expression ranks in 83 transcriptome datasets.
	Rank
Gene	Minimum	Maximum	Median	Mean	Description	Promoters tested in this study1
AFLA_090780	1	32	5	8	translation elongation factor EF-1 alpha subunit , putative	ü
AFLA_064900	1	9772	12	891.048	hypothetical protein
AFLA_025100	3	886	12	62.7831	glyceraldehyde 3-phosphate dehydrogenase GpdA	ü
AFLA_014570	1	313	12	44.8795	conserved hypothetical protein	ü
AFLA_050690	3	174	16	31.8193	mitochondrial ADP,ATP carrier protein (Ant), putative
AFLA_113120	5	177	18	31.9518	GPI-anchored cell wall organization protein Ecm33	ü
AFLA_048690	1	1022	18	112.88	alcohol dehydrogenase, putative
AFLA_063260	1	11577	19	2377.48	conserved hypothetical protein
AFLA_083050	1	98	21	29.5181	40S ribosomal protein S25, putative
AFLA_052860	1	555	32	96.0723	chaperone/heat shock protein Hsp12, putative	ü
AFLA_047870	7	128	34	42.3133	40S ribosomal protein S3Ae
AFLA_006300	8	570	34	61.7952	nucleoside diphosphate kinase
AFLA_030930	6	140	34	38.5904	fructose-bisphosphate aldolase, class II	ü
AFLA_017610	4	115	36	41.5783	histone H3
AFLA_031390	1	169	36	50.0843	ubiquitin (UbiC), putative
AFLA_017620	3	292	41	52.988	histone H4.1
AFLA_088570	5	337	48	72.0602	conserved hypothetical protein
AFLA_099650	14	1512	49	157.627	woronin body major protein precursor, putative
AFLA_020690	2	6810	49	549.157	extracellular serine-threonine rich protein
AFLA_112390	10	294	50	72.5783	60S ribosomal protein L36
AFLA_047440	9	402	51	72.3494	60S ribosomal protein L18
AFLA_099010	15	866	51	104.578	transaldolase
AFLA_003480	10	1054	52	91.9518	60S ribosomal protein L32
AFLA_010910	10	948	53	112.12	FKBP-type peptidyl-prolyl isomerase, putative
AFLA_127610	7	139	53	56.2048	high expression lethality protein Hel10, putative
AFLA_132990	7	236	55	71.7108	ribosomal protein L34 protein, putative
AFLA_044110	3	1265	58	132.434	40S ribosomal protein Rps16, putative
AFLA_020720	16	388	58	95.759	conserved hypothetical protein
AFLA_104040	8	213	62	73.1446	histone H2B
AFLA_091990	4	389	63	84.2289	peptidyl-prolyl cis-trans isomerase
AFLA_100110	9	1404	64	134.482	plasma membrane H+-ATPase Pma1
AFLA_045790	16	216	66	79.2289	60S ribosomal protein L30, putative
AFLA_108790	6	4677	66	316.289	aldehyde dehydrogenase AldA, putative
AFLA_055450	10	1614	68	185.108	translation elongation factor eEF-1 subunit gamma, putative
AFLA_075030	13	298	69	92.8554	40S ribosomal protein S13
AFLA_048140	13	229	70	88.7711	60S ribosomal protein L23
AFLA_092370	20	207	71	81.012	alkaline serine protease
AFLA_080530	6	435	71	82.9518	conserved hypothetical protein
AFLA_134740	19	404	72	110.747	60S ribosomal protein L3
AFLA_027710	23	241	73	82.0241	cyclophilin, putative
AFLA_081900	1	11479	75	2843.92	hypothetical protein
AFLA_098380	1	8000	77	1706.7	conidial hydrophobin RodA/RolA
AFLA_021730	21	256	78	102.361	ribosomal protein S23 (S12)
AFLA_113260	14	2558	78	222.434	allergen Asp F7
AFLA_027810	1	6109	78	1376.05	alkaline serine protease Alp1
AFLA_048810	29	245	79	97.6506	60S ribosomal protein L8, putative
AFLA_099070	1	12953	80	1609.98	hypothetical protein
AFLA_065960	3	10257	82	2409.42	fucose-specific lectin FleA
AFLA_026830	8	391	82	115.036	40S ribosomal protein S6
AFLA_136640	19	376	82	97.1205	translation elongation factor EF-2 subunit, putative
AFLA_118490	3	7791	82	1562.08	hypothetical protein
AFLA_103770	13	310	84	94.0723	60S ribosomal protein L27a, putative
AFLA_087760	14	319	85	104.024	40S ribosomal protein S11
AFLA_135200	3	10767	86	2071.93	conserved hypothetical protein
AFLA_033690	18	517	87	114.241	60S ribosomal protein L31e
AFLA_080140	33	258	87	102	60S ribosomal protein L12
AFLA_031570	1	3732	87	435.048	pyruvate decarboxylase PdcA, putative
AFLA_041990	25	365	87	114.036	60S ribosomal protein L17
AFLA_050650	22	275	88	107.627	40S ribosomal protein S19
AFLA_125890	24	429	91	123.843	40S ribosomal protein S17, putative
AFLA_115110	14	329	91	112.241	60S ribosomal protein L13
AFLA_031250	27	758	95	135.687	aspartic endopeptidase Pep2
AFLA_026380	6	261	96	106.651	polyubiquitin UbiD/Ubi4, putative
AFLA_046850	4	301	100	122.711	60S ribosomal protein L44
AFLA_022400	30	257	100	113.096	autophagic death protein IDI-7, putative
AFLA_127860	15	441	102	116.193	60S acidic ribosomal protein P1
AFLA_113040	23	10285	102	790.229	outer mitochondrial membrane protein porin
AFLA_101150	22	587	103	158.12	60S ribosomal protein L21, putative
AFLA_021080	8	215	103	103.012	ribosomal S30/ubiquitin fusion
AFLA_049470	5	13010	104	1533.08	conserved hypothetical protein
AFLA_068360	2	969	105	156.458	GPI anchored protein, putative
AFLA_119660	33	3200	106	290.602	ATP synthase F1, beta subunit, putative
AFLA_004650	3	1730	107	256.253	thiamine biosynthesis protein (Nmt1), putative
AFLA_056980	14	7076	110	2079.41	conserved hypothetical protein
AFLA_050000	25	903	111	172.699	ribosomal protein L16a
AFLA_028800	42	9503	111	752.048	Eukaryotic translation initiation factor eIF-5A
AFLA_033980	31	700	113	171.361	cytosolic large ribosomal subunit protein L7A
AFLA_115930	6	1389	115	232.494	conserved hypothetical protein
AFLA_044530	35	322	117	134.759	40S ribosomal protein S15, putative
AFLA_082510	58	327	119	135.036	TCTP family protein
AFLA_029260	10	437	120	143.482	60S ribosomal protein L15, putative
AFLA_044520	23	750	121	163.434	60S acidic ribosomal protein P2/allergen Asp F 8
AFLA_002560	43	396	121	151.578	60S ribosomal protein L37a
AFLA_127800	27	303	122	124.711	40S ribosomal protein S26
AFLA_017910	30	976	122	179.602	transketolase TktA
AFLA_088370	64	417	123	158.12	60S ribosomal protein L9, putative
AFLA_037480	12	1339	124	164.301	enolase/allergen Asp F 22
AFLA_084620	48	2224	127	272.735	40S ribosomal protein S5, putative
AFLA_099020	32	1531	129	223.133	autophagic serine protease Alp2
AFLA_084330	26	630	131	165.024	mitochondrial phosphate carrier protein (Mir1), putative
AFLA_112090	18	503	131	158.386	60S ribosomal protein L11
AFLA_101020	51	901	135	221.976	40S ribosomal protein S4, putative
AFLA_079880	20	761	136	198.892	60S ribosomal protein L22, putative
AFLA_078650	47	1006	137	184.434	mitochondrial F1 ATPase subunit alpha, putative
AFLA_040120	13	4409	139	452.277	flavohemoprotein
AFLA_060150	47	734	140	182.88	ribosomal protein L26
AFLA_091060	10	4304	141	491.265	allergen Asp F3
AFLA_075190	4	8645	142	664.289	conserved hypothetical protein
AFLA_029450	39	409	144	170.627	Ribosomal L18ae protein family
AFLA_046970	100	13362	147	1391.14	60S ribosomal protein L19
AFLA_103570	38	584	153	191.398	ZZ type zinc finger domain protein
AFLA_033650	89	1751	154	285.024	GTP-binding nuclear protein Ran, putative
AFLA_037160	5	473	154	157.229	thiazole biosynthesis enzyme Sti35
AFLA_044170	49	1059	155	235.988	40S ribosomal protein S11
AFLA_030140	31	970	155	237.506	60S ribosomal protein P0
AFLA_014100	66	2800	156	269.988	conserved hypothetical protein
AFLA_117970	16	1032	157	214.096	opsin, putative
AFLA_069180	10	466	158	168.94	60S ribosomal protein L35
AFLA_037960	81	383	158	165.819	glucosamine-fructose-6-phosphate aminotransferase
AFLA_129440	13	5586	158	457.458	1,3-beta-glucanosyltransferase, putative
AFLA_045730	63	1106	158	216.554	Mitochondrial ATP synthase epsilon chain domain-containing protein
AFLA_058480	31	2360	161	245.072	1,3-beta-glucanosyltransferase Gel1
AFLA_065940	35	936	161	216.916	glyoxalase family protein
AFLA_068420	70	487	161	193.783	60S ribosomal protein L6
AFLA_036840	67	484	161	181.241	6-phosphogluconate dehydrogenase Gnd1, putative
AFLA_070990	54	3024	163	409.916	UTP-glucose-1-phosphate uridylyltransferase Ugp1, putative
AFLA_070070	20	9277	163	1880.55	conserved hypothetical protein
AFLA_135920	41	364	163	164.446	cytochrome c oxidase polypeptide vib
AFLA_117990	29	799	164	214.94	ribosomal protein S5
AFLA_045260	20	659	167	178.373	conserved hypothetical protein
AFLA_104030	34	371	168	163.133	histone H2A
AFLA_098850	18	11706	168	1123.08	hypothetical protein
AFLA_018550	24	1686	169	239.181	glycogen phosphorylase GlpV/Gph1, putative
AFLA_009000	103	601	169	202.976	ribosomal protein S13p/S18e
AFLA_117640	24	9088	169	650.506	CipC-like antibiotic stress responsive protein
AFLA_028830	3	6447	170	1300.76	FG-GAP repeat protein, putative
AFLA_112910	17	2126	170	276.084	conserved hypothetical protein
AFLA_119650	49	924	174	238.771	cytochrome c oxidase subunit V
AFLA_091250	89	777	175	231.988	60S ribosomal protein L24a
AFLA_094980	1	12722	175	4566.29	conserved hypothetical protein
AFLA_092120	6	446	176	188.88	40S ribosomal protein S21
AFLA_107810	64	1258	177	266.807	heterogeneous nuclear ribonucleoprotein G, putative
AFLA_111980	69	872	179	260.831	60S ribosomal protein L38, putative
AFLA_100940	98	723	180	234.88	60S ribosomal protein L37
AFLA_087430	31	5160	180	400.229	allergen Asp F4
AFLA_015580	17	755	180	220.566	sorbitol/xylulose reductase Sou1-like, putative
AFLA_083740	68	615	182	215.133	40S ribosomal protein S22
AFLA_044820	98	584	184	209.771	glucose-6-phosphate isomerase
AFLA_034280	41	493	185	202.169	40S ribosomal protein S29, putative
AFLA_101160	57	576	185	205.506	40S ribosomal protein S9
AFLA_022380	24	5770	189	391.88	molecular chaperone Hsp70
AFLA_127220	79	827	192	238.205	60S ribosomal protein L27e
AFLA_110130	7	1819	193	309.41	ATP synthase subunit ATP9, putative
AFLA_086630	66	1258	193	267.084	60S ribosomal protein L35Ae
AFLA_119640	71	655	193	220.325	cofilin
AFLA_131860	49	1760	194	275.325	conserved hypothetical protein
AFLA_130310	93	381	195	200.916	protein disulfide isomerase Pdi1, putative
AFLA_083470	63	533	197	218.434	Ribosomal protein S28e
AFLA_041710	74	923	199	273.795	60S ribosomal protein L7
AFLA_133920	41	394	200	211.301	Acyl CoA binding protein family
AFLA_086540	87	681	201	222.627	glycine-rich RNA-binding protein, putative
AFLA_005730	50	936	201	277.867	60S ribosomal protein L4, putative
AFLA_136570	19	593	203	220.952	cytochrome c
AFLA_103180	54	460	204	202	cytochrome c oxidase subunit VIa, putative
AFLA_129660	125	440	206	213.313	mitochondrial F1F0 ATP synthase subunit F (Atp17), putative
AFLA_076170	2	11934	207	3486.63	conserved hypothetical protein
AFLA_052800	45	675	208	222.422	1,3-beta-glucan synthase catalytic subunit FksP
AFLA_020510	77	3824	210	512.855	40S ribosomal protein S0
AFLA_055230	139	1202	212	272.614	actin Act1
AFLA_112700	63	504	214	225.096	cytochrome c subunit, putative
AFLA_078330	1	11141	214	2035.31	conserved hypothetical protein
AFLA_055060	25	4657	214	589.12	NAD-dependent formate dehydrogenase AciA/Fdh
AFLA_069590	99	1309	214	344.759	adenosylhomocysteinase
AFLA_031960	109	685	216	276.205	40S ribosomal protein S7e
AFLA_071320	73	602	216	254.566	37S ribosomal protein S24
AFLA_043150	29	857	217	291.916	40S ribosomal protein S10a
AFLA_100890	92	648	217	239.855	bZIP transcription factor JlbA, putative
AFLA_054760	97	1264	221	336.916	60S ribosomal protein L28
AFLA_068040	87	402	221	228.181	ADP-ribosylation factor, putative
AFLA_018700	21	815	223	262.88	60S ribosomal protein L5, putative
AFLA_090690	58	6325	223	689.084	mycelial catalase Cat1
AFLA_004350	3	11133	224	3365.36	phosphatidylserine decarboxylase family protein
AFLA_065180	66	742	224	239.373	thioredoxin, putative
AFLA_014600	130	482	226	242.072	profilin Pfy1, putative
AFLA_073480	62	460	228	231.554	tropomyosin, putative
AFLA_068300	18	603	228	223.096	1,3-beta-glucanosyltransferase Bgt1
AFLA_043980	28	2819	233	311.06	mannitol-1-phosphate dehydrogenase
AFLA_030710	115	4661	233	561.554	phosphoglucomutase PgmA
AFLA_113240	47	1245	235	265.928	GPI anchored cell wall protein, putative
AFLA_050950	77	1410	236	306.241	40S ribosomal protein S3, putative
AFLA_103940	45	506	237	242.916	glutamate carboxypeptidase, putative
AFLA_112120	19	1113	238	326.771	pyruvate carboxylase, putative
AFLA_134420	27	12138	241	1858.17	MFS monosaccharide transporter, putative
AFLA_119460	42	2972	241	512.651	UDP-glucose 4-epimerase
AFLA_011700	25	2407	242	396.518	GPI anchored protein, putative
AFLA_051980	32	977	242	296.759	G-protein complex beta subunit CpcB
AFLA_097750	4	9136	243	1968.84	conserved hypothetical protein
AFLA_004950	80	1632	244	406.398	cytochrome c oxidase subunit Va, putative
AFLA_113320	22	11565	244	1007.12	Glutamate/Leucine/Phenylalanine/Valine dehydrogenase, putative
AFLA_137560	15	6707	244	900.337	conserved hypothetical protein
AFLA_135700	7	4549	245	800.506	allergenic cerato-platanin Asp F13
AFLA_078420	9	1490	246	312.566	fumarate reductase Osm1, putative
AFLA_139480	65	9071	248	1787.46	dimethylallyl tryptophan synthase, putative
AFLA_027730	97	780	250	286.904	glycerol dehydrogenase (GldB), putative
AFLA_056250	121	1568	251	361.639	ribosomal protein L14
AFLA_076710	77	929	251	274.627	malate dehydrogenase, NAD-dependent
AFLA_099220	33	6408	252	970.181	conserved hypothetical protein
AFLA_062100	13	1037	253	322.687	HAD superfamily hydrolase, putative
AFLA_051840	107	700	255	272.928	tubulin beta subunit
AFLA_111100	86	1342	258	339.398	mitochondrial peroxiredoxin Prx1, putative
AFLA_099000	2	3450	260	708.819	Cu,Zn superoxide dismutase SOD1
AFLA_069010	49	5472	263	687.988	S-adenosylmethionine synthetase
AFLA_019620	4	5506	264	719.313	conserved hypothetical protein
AFLA_056260	62	843	267	325.867	nascent polypeptide-associated complex (NAC) subunit, putative
AFLA_092450	163	717	268	335.325	14-3-3 family protein ArtA, putative
AFLA_091720	10	2031	269	428.663	conserved hypothetical protein
AFLA_103050	68	808	270	312.699	conserved hypothetical protein
AFLA_084860	25	6454	270	1450.59	conserved hypothetical protein
AFLA_086620	96	932	270	313.735	glucose-6-phosphate 1-dehydrogenase
AFLA_076430	36	3382	272	530.06	SUN domain protein (Uth1), putative
AFLA_095590	127	542	276	289.217	Hsp90 binding co-chaperone (Sba1), putative
AFLA_080020	161	824	276	298.277	ATP synthase gamma chain, mitochondrial precursor, putative
AFLA_083110	2	6983	277	1246.34	conidiation-specific protein (Con-10), putative
AFLA_080920	86	4520	277	431.831	tubulin alpha-1 subunit
AFLA_130100	98	1316	279	332.277	snRNP and snoRNP protein (Snu13), putative
AFLA_043330	174	761	280	314.373	mitochondrial F1F0 ATP synthase subunit Atp18, putative
AFLA_133940	25	4225	280	624.434	conserved hypothetical protein
AFLA_137440	6	839	281	302.855	histone H4, putative
AFLA_026020	36	578	281	294.578	calmodulin
AFLA_071350	115	577	283	312.59	UDP-N-acetylglucosamine pyrophosphorylase
AFLA_011530	4	6253	285	1078.8	hypothetical protein
AFLA_087180	81	2174	286	351.88	endo alpha-1,4 polygalactosaminidase, putative
AFLA_016950	47	470	290	272.422	SNARE protein Snc2, putative
AFLA_020280	159	1452	293	353.205	glycolipid transfer protein HET-C2, putative
AFLA_079020	65	5283	295	715.325	conserved hypothetical protein
AFLA_033420	1	12425	296	2161.84	Mn superoxide dismutase MnSOD
AFLA_078320	33	3864	296	562.663	cell wall glucanase (Scw11), putative
AFLA_094630	29	8427	302	989.783	triosephosphate isomerase
AFLA_050800	148	2545	302	448.554	40S ribosomal protein S12
AFLA_034050	152	815	303	317.699	mitochondrial aconitate hydratase, putative
AFLA_112470	150	1393	303	400.807	cobalamin-independent methionine synthase MetH/D
AFLA_043110	172	673	304	334.458	dihydrolipoamide dehydrogenase
AFLA_057240	106	860	306	381.867	RNP domain protein
AFLA_047090	39	8801	308	1032.64	GPI anchored protein, putative
AFLA_053700	1	9657	309	1542.29	conserved hypothetical protein
AFLA_081480	38	2995	311	632.566	IgE-binding protein
AFLA_051930	86	7385	312	834.036	glutamine synthetase
AFLA_089270	83	431	315	284.771	bZIP transcription factor HacA
AFLA_037910	154	738	315	348.651	NAD(+)-isocitrate dehydrogenase subunit I
AFLA_058310	107	821	316	355.072	formaldehyde dehydrogenase
AFLA_059390	125	4746	317	689.639	conserved hypothetical protein
AFLA_015800	16	1111	317	386.614	DUF636 domain protein
AFLA_027070	20	802	317	332.916	acetyl-coenzyme A synthetase FacA
AFLA_032250	153	2630	322	508.952	nuclear transport factor NTF-2, putative
AFLA_079810	194	521	322	329.048	vacuolar ATP synthase 16 kDa proteolipid subunit, putative
AFLA_037320	218	651	324	334.735	Rho GTPase Rho1
AFLA_106350	124	945	327	372.398	ATP citrate lyase subunit (Acl), putatibe
AFLA_083120	70	1824	328	544.205	thioredoxin, putative
AFLA_122370	1	8914	328	2234.17	MFS peptide transporter, putative
AFLA_066970	84	2528	328	553.494	conserved hypothetical protein
AFLA_004690	8	3100	330	530.747	conserved hypothetical protein
AFLA_110690	86	1135	330	382.506	cytochrome c peroxidase Ccp1, putative
AFLA_012160	174	665	334	352.386	acetyl-CoA acetyltransferase, putative
AFLA_069840	50	692	335	320.325	conserved hypothetical protein
AFLA_029310	11	2546	338	446.916	alcohol dehydrogenase, zinc-containing, putative
AFLA_040110	19	12521	338	1178.78	GPI anchored protein, putative
AFLA_048760	204	1089	338	360.711	membrane biogenesis protein (Yop1), putative
AFLA_048530	131	545	339	347.952	sulfur metabolism regulator SkpA, putative
AFLA_013230	10	9992	340	2703.58	steroid monooxygenase, putative
AFLA_026500	220	621	341	351.325	conserved hypothetical protein
AFLA_050120	100	723	343	362.386	glutaredoxin Grx1, putative
AFLA_040260	21	8107	344	1104.45	HLH DNA binding domain protein, putative
AFLA_114470	138	860	344	374.301	conserved hypothetical protein
AFLA_068270	168	1978	345	509.036	conserved hypothetical protein
AFLA_135910	195	602	346	352.904	conserved hypothetical protein
AFLA_108100	38	845	347	388.241	argininosuccinate synthase
AFLA_080240	218	882	347	394.819	ATP synthase delta chain, mitochondrial precursor, putative
AFLA_017950	158	1583	350	397.976	ubiquinol-cytochrome C reductase complex subunit UcrQ, putative
AFLA_048840	180	3233	350	673.458	adenosine kinase, putative
AFLA_033620	12	1547	351	400.482	RNA binding protein, putative
AFLA_076690	54	12373	352	1294.11	conserved hypothetical protein
AFLA_094600	12	8005	353	2001.77	conserved hypothetical protein
AFLA_087900	48	6203	353	877.831	pyruvate kinase
AFLA_135540	240	819	354	380.289	ATP synthase oligomycin sensitivity conferral protein, putative
AFLA_075100	45	5790	357	776.892	conserved hypothetical protein
AFLA_017860	6	2269	360	516.663	hypothetical protein
AFLA_029850	11	12276	360	3162.99	cysteine-rich secreted protein
AFLA_025130	16	5405	361	852.193	BYS1 domain protein, putative
AFLA_081190	131	5398	362	654.024	conserved hypothetical protein
AFLA_019230	11	4554	363	753.928	mismatched base pair and cruciform DNA recognition protein, putative
AFLA_099150	68	6021	364	1077.66	thioredoxin m(mitochondrial)-type, putative
AFLA_066300	4	8173	367	2441.33	endoglucanase, putative
AFLA_127210	25	1675	367	413.301	pathogenesis associated protein Cap20, putative
AFLA_041590	4	2549	369	563.711	peroxisomal multifunctional beta-oxidation protein (MFP), putative
AFLA_048050	207	605	369	376.337	nucleosome assembly protein Nap1, putative
AFLA_034240	174	2484	371	513.747	dienelactone hydrolase family protein
AFLA_069920	191	945	372	416.217	GTP-binding protein YchF
AFLA_008990	128	830	375	372.663	carboxypeptidase CpyA/Prc1, putative
AFLA_085420	155	5394	376	857.084	serine hydroxymethyltransferase, putative
AFLA_078520	252	836	378	407.217	mitochondrial ATPase subunit ATP4, putative
AFLA_124890	2	10567	379	2347.33	hypothetical protein
AFLA_105630	8	13147	379	2999.96	cytochrome P450 monooxygenase, putative
AFLA_002370	222	1052	379	424.41	cell division control protein Cdc48
AFLA_007020	181	2469	381	474.687	citrate synthase (Cit1), putative
AFLA_050250	22	777	381	350.349	bZIP transcription factor CpcA
AFLA_091650	42	13262	381	1719.52	GPI anchored protein, putative
AFLA_031780	182	1372	383	463.108	telomere and ribosome associated protein Stm1, putative
AFLA_007140	200	1769	384	458.952	aminopeptidase, putative
AFLA_058580	146	6383	384	1187.95	GTP cyclohydrolase II, putative
AFLA_053660	47	8370	385	2376.42	nuclear transport factor 2 domain protein
AFLA_051250	69	7722	387	1537.61	GPI anchored serine-rich protein
AFLA_017920	111	1380	389	446.759	spermidine synthase
AFLA_049390	6	3518	392	675.325	malate synthase AcuE
AFLA_031000	124	679	394	390.373	nucleosome binding protein (Nhp6a), putative
AFLA_060260	1	3439	396	855.952	heat shock protein Hsp30/Hsp42, putative
AFLA_021960	213	1713	397	509.458	pyruvate dehydrogenase E1 component alpha subunit, putative
AFLA_033670	20	1605	402	516.434	lipid transfer protein, putative
AFLA_019280	226	1195	403	489.205	peroxiredoxin, putative
AFLA_022410	18	4184	404	868.458	coproporphyrinogen III oxidase, putative
AFLA_084740	16	7530	405	976.108	conserved hypothetical protein
AFLA_015290	127	1020	407	429.205	conserved hypothetical protein
AFLA_043860	23	2648	407	705.229	conserved hypothetical protein
AFLA_004560	292	628	408	427.494	vacuolar ATP synthase catalytic subunit A, putative
AFLA_089750	192	1149	410	476.169	tyrosyl-tRNA synthetase
AFLA_047410	155	720	410	411.759	actin-bundling protein Sac6, putative
AFLA_103290	197	5415	411	858.904	histone H1
AFLA_098700	64	5785	411	1366.19	carbonyl reductase, putative
AFLA_023600	13	6488	415	1349.9	cell wall protein PhiA
AFLA_098120	35	7669	416	2444.47	conserved hypothetical protein
AFLA_034340	192	2285	416	577.59	40S ribosomal protein S10b
AFLA_032070	310	645	420	426.614	mitochondrial F1F0 ATP synthase subunit Atp14, putative
AFLA_071230	116	1331	422	467.241	AIF-like mitochondrial oxidoreductase (Nfrl), putative
AFLA_087170	36	5654	423	1069.46	extracellular serine-rich protein, putative
AFLA_131400	198	2917	424	627.169	conserved hypothetical protein
AFLA_027310	56	1869	426	543.566	fructose-1,6-bisphosphatase Fbp1, putative
AFLA_042050	124	4097	428	980.241	metalloreductase, putative
AFLA_070010	80	2301	428	636.759	conserved hypothetical protein
AFLA_117850	207	1261	429	512.976	RPEL repeat protein
AFLA_073800	14	3133	430	630	short chain dehydrogenase/reductase family
AFLA_101780	33	6319	433	735.723	NADH-cytochrome B5 reductase, putative
AFLA_073560	5	9431	433	1706.05	amino acid permease (Gap1), putative
AFLA_008890	94	5609	434	1012.24	glutamate decarboxylase
AFLA_027540	221	1885	435	561.976	hypothetical protein
AFLA_007120	101	939	436	444.169	secretion related GTPase SrgB/Ypt1
AFLA_133990	240	804	437	469.916	secretory pathway gdp dissociation inhibitor
AFLA_036400	12	9505	439	2617.01	conserved hypothetical protein
AFLA_041010	117	7562	439	1027.4	conserved hypothetical protein
AFLA_073780	4	3205	440	802.241	conserved hypothetical protein
AFLA_009430	236	3381	442	656.229	hypothetical protein
AFLA_007640	11	13004	445	2367.65	conserved hypothetical protein
AFLA_035500	248	1252	447	489.928	cytochrome b5, putative
AFLA_119340	65	5740	447	1173.4	conserved hypothetical protein
AFLA_037570	222	6525	447	1296.93	CFEM domain protein, putative
AFLA_092100	78	4309	448	793.892	IMP dehydrogenase, putative
AFLA_129650	233	1033	450	478.06	NADH-ubiquinone oxidoreductase 18 kDa subunit, putative
AFLA_094450	5	9750	450	3295.92	aspartic endopeptidase Pep1/aspergillopepsin F
AFLA_132620	262	4127	451	721.663	rho-gdp dissociation inhibitor
AFLA_105740	127	3682	452	852.542	sulfide quinone reductase, putative
AFLA_102880	203	2122	453	509.313	translation initiation factor SUI1, putative
AFLA_011660	157	1395	454	521.422	conserved hypothetical protein
AFLA_027500	143	3356	457	680.783	mannose-1-phosphate guanylyltransferase
AFLA_003650	58	2854	461	695.687	uracil phosphoribosyltransferase
AFLA_112150	114	836	461	463.313	phosphoribosylaminoimidazolecarboxamide formyltransferase/IMP
AFLA_007010	152	1075	461	485.47	mitochondrial DNA replication protein (Yhm2), putative
AFLA_056870	22	13222	462	3283.25	conserved hypothetical protein
AFLA_127950	52	6435	466	908.494	conserved hypothetical protein
AFLA_119210	161	2626	467	687.325	conserved hypothetical protein
AFLA_108740	2	11399	470	1091.76	hypothetical protein
AFLA_004090	157	3621	471	682.819	conserved hypothetical protein
AFLA_083590	110	13184	471	1676.88	fatty acid hydroxylase, putative
AFLA_003220	167	1000	471	493.566	phospholipase D (PLD), putative
AFLA_089210	170	3023	471	618.518	pyruvate dehydrogenase E1 beta subunit PdbA, putative
AFLA_071090	12	6662	472	1089.37	GTP-binding protein EsdC
AFLA_084650	234	2509	473	634.988	palmitoyltransferase with autoacylation activity Pfa4, putative
AFLA_119550	64	10940	474	1538.46	pentatricopeptide repeat protein
AFLA_017220	190	13324	475	2507.29	pyridoxal-dependent decarboxylase domain protein
AFLA_063270	67	12407	476	3144.69	hypothetical protein
AFLA_035330	236	1503	476	531.181	translation release factor eRF3, putative
AFLA_104010	168	1010	478	504.108	dihydrolipoamide succinyltransferase, putative
AFLA_114780	187	3528	482	640.349	conserved hypothetical protein
AFLA_051530	43	6024	483	1344.02	methylmalonate-semialdehyde dehydrogenase, putative
AFLA_050790	120	823	483	487.614	histone deacetylase complex subunit (Hos4), putative
AFLA_110810	317	1282	484	517.94	possible apospory-associated protein c
AFLA_091310	256	1299	486	583.687	eukaryotic translation initiation factor eIF-1A subunit, putative
AFLA_053390	136	5257	488	999.831	GPI-anchored cell wall beta-1,3-endoglucanase EglC
AFLA_062040	1	3144	491	841.253	stress protein DDR48, putative
AFLA_026470	162	4277	495	858.048	aspartate aminotransferase, putative
AFLA_045290	9	11756	495	2050.94	extracellular endoglucanase/cellulase, putative
AFLA_047240	232	1219	495	526	cystathionine beta-synthase, putative
AFLA_048010	275	985	497	525.06	seryl-tRNA synthetase
AFLA_089160	136	2419	497	635.12	fatty acid synthase beta subunit, putative
AFLA_106710	83	1677	498	517.723	conserved hypothetical protein
AFLA_013180	106	10910	498	2187.24	williams-beuren syndrome chromosome region, putative
AFLA_087820	29	3646	499	762.012	cell wall integrity signaling protein Lsp1/Pil1, putative
AFLA_049920	234	1015	499	523.928	dienelactone hydrolase family protein
AFLA_005720	47	6453	499	870.627	conserved hypothetical protein
AFLA_110260	118	6680	501	1063.72	flavin-binding monooxygenase-like protein
AFLA_015230	330	972	502	549.108	poly(A)+ RNA transport protein (UbaA), putative
AFLA_025510	55	7001	502	1986.23	GPI anchored protein, putative
AFLA_048440	11	7732	503	1639.24	conserved hypothetical protein
AFLA_091980	1	10573	506	2065.8	Ctr copper transporter family protein
AFLA_059970	132	2182	509	690.458	short-chain dehydrogenase, putative
AFLA_032740	146	2952	509	653.169	transcription factor TFIID
AFLA_061200	206	1289	512	571.229	conserved hypothetical protein
AFLA_012230	308	915	512	524.277	conserved hypothetical protein
AFLA_033120	86	1055	512	519.663	BAP31 domain protein, putative
AFLA_047890	279	1268	512	556.229	cytosine deaminase-uracil phosphoribosyltransferase fusion protein
AFLA_127650	241	1418	514	543.916	acyl carrier protein, putative
AFLA_048510	368	1084	516	559.59	UV excision repair protein (RadW), putative
AFLA_076600	34	2179	517	613.771	translation elongation factor eEF-3, putative
AFLA_121090	39	3009	517	1014.23	conserved hypothetical protein
AFLA_073990	328	1168	518	548.337	proteasome component Pre3, putative
AFLA_088720	255	1474	520	590.651	iron/copper transporter Atx1, putative
AFLA_018850	262	3106	520	716.193	isocitrate dehydrogenase, NAD-dependent
AFLA_024970	101	3231	520	825.422	conserved hypothetical protein
AFLA_056500	189	1910	522	589.711	NADH-ubiquinone oxidoreductase subunit B17.2, putative
AFLA_118050	30	9806	523	1299.93	MFS peptide transporter Ptr2, putative
AFLA_037840	355	976	525	545.747	proteasome component Pre4, putative
AFLA_052630	333	1312	529	585.518	NADH-ubiquinone oxidoreductase 213 kDa subunit
AFLA_132540	70	1825	530	629.59	thioredoxin TrxA
AFLA_006370	253	2569	530	566.072	glutamyl-tRNA synthetase
AFLA_119290	184	7966	531	1112.72	phosphofructokinase, putative
AFLA_076880	114	3605	531	820.892	stearic acid desaturase (SdeA), putative
AFLA_036460	41	1539	532	579.687	Copper fist DNA binding domain protein
AFLA_017710	289	1252	532	559.988	isoleucyl-tRNA synthetase ,cytoplasmic
AFLA_045920	300	1327	534	610.036	prohibitin, putative
AFLA_092700	63	5405	535	1039.25	protein tyrosine phosphatase Pps1, putative
AFLA_062120	245	7318	535	1539.63	amino acid transporter, putative
AFLA_076680	220	10958	536	1136.51	pyruvate dehydrogenase complex, dihydrolipoamide acetyltransferase
AFLA_091180	253	1804	537	597.277	ARP2/3 complex 20 kDa subunit (p20-ARC), putative
AFLA_027720	121	3782	537	787.349	phosphatidyl synthase
AFLA_044030	119	1796	538	581.422	conserved hypothetical protein
AFLA_088810	140	2029	539	582.639	glycerol-3-phosphate dehydrogenase, mitochondrial
AFLA_113140	222	1637	539	640.048	ubiquinol-cytochrome c reductase complex 14 kDa protein
AFLA_130150	31	1876	542	645.831	NAD+ dependent glutamate dehydrogenase, putative
AFLA_086430	278	1473	543	594.59	coactivator bridging factor 1 (Mbf1), putative
AFLA_091270	325	893	544	547.952	fumarate hydratase, putative
AFLA_009110	158	4683	545	871.193	cwl1, putative
AFLA_050930	326	1464	547	628.831	protein phosphotase 2a 65kd regulatory subunit
AFLA_091660	87	6248	550	1443.27	Ctr copper transporter, putative
AFLA_044730	53	13125	550	1930.73	oxidoreductase, 2-nitropropane dioxygenase family, putative
AFLA_111070	108	2072	551	813.349	aldehyde dehydrogenase, putative
AFLA_012410	245	786	551	526.337	None
AFLA_051520	46	2266	555	759.169	conserved hypothetical protein
AFLA_007190	236	1624	556	625.229	NADH-ubiquinone oxidoreductase, subunit G, putative
AFLA_135530	139	3708	559	825.855	conserved hypothetical protein
AFLA_071060	181	1540	560	628.217	TOM core complex subunit Tom6, putative
AFLA_063320	12	12698	561	3243.12	conserved hypothetical protein
AFLA_080390	273	6638	562	948.169	6-phosphogluconolactonase, putative
AFLA_047330	360	922	563	572.048	leukotriene A4 hydrolase
AFLA_119870	221	1056	563	589.06	iron-sulfur protein subunit of succinate dehydrogenase Sdh2, putative
AFLA_057140	168	3269	565	878	nucleoside-diphosphate-sugar epimerase, putative
AFLA_039560	196	1831	566	622.699	WW domain protein
AFLA_054700	402	2916	566	692.361	CCAAT-binding factor complex subunit HapE
AFLA_071010	201	1035	566	565.892	heat shock protein (Sti1), putative
AFLA_048370	365	3535	567	831.024	glycyl-tRNA synthetase
AFLA_026920	264	1358	569	593.494	conserved hypothetical protein
AFLA_130240	267	3200	570	814.855	DUF907 domain protein
AFLA_099790	212	3097	571	815	conserved hypothetical protein
AFLA_128800	207	1153	572	592.47	proteasome component Pre9, putative
AFLA_010930	183	2492	572	733.494	glutathione S-transferase family protein, putative
AFLA_034190	230	6084	574	1073.42	NADH-ubiquinone oxidoreductase 39 kDa subunit, putative
AFLA_076910	167	1312	575	602.349	cytokinesis EF-hand protein Cdc4, putative
AFLA_041730	286	2148	576	708.096	eukaryotic translation initiation factor 3 subunit EifCc, putative
AFLA_001010	39	10661	577	2154.12	benzoate 4-monooxygenase cytochrome P450, putative
AFLA_079910	297	4735	578	848.458	glutathione peroxidase Hyr1, putative
AFLA_011300	179	8922	578	1969.43	conserved hypothetical protein
AFLA_110600	316	1441	578	617.855	aminopeptidase
AFLA_134930	48	3531	578	797.241	mitochondrial phosphate transporter Pic2, putative
AFLA_045980	40	5053	578	1146.67	secreted dipeptidyl peptidase DppV
AFLA_057360	426	1201	582	644.06	proteasome regulatory particle subunit Rpt2, putative
AFLA_060620	159	1484	582	630.084	conserved hypothetical protein
AFLA_062460	36	5199	582	978.831	non-classical export protein Nce102, putative
AFLA_036630	34	9850	582	1428.63	carbon catabolite repression protein CreD, putative
AFLA_002670	298	3049	583	765.663	curved DNA-binding protein (42 kDa protein)
AFLA_085400	69	3107	584	796.639	phosphoglycerate mutase, 2,3-bisphosphoglycerate-independent
AFLA_022470	264	3267	587	762.193	adenylate kinase, putative
AFLA_037850	384	904	589	605.349	proteasome component Prs3, putative
AFLA_115340	163	1094	594	592.036	proteasome regulatory particle subunit Rpt6, putative
AFLA_086280	291	2791	595	763.819	NADH-ubiquinone oxidoreductase subunit GRIM-19, putative
AFLA_032230	31	3552	596	828.048	meiotic sister chromatid recombination protein Ish1/Msc1, putative
AFLA_086800	295	3131	596	936.398	epoxide hydrolase, putative
AFLA_085960	7	4529	596	1291.37	cell surface protein, putative
AFLA_011580	295	1828	597	699.639	conserved hypothetical protein
AFLA_039130	255	5984	598	794.313	sensor histidine kinase/response regulator TcsB/Sln1, putative
AFLA_016990	237	1025	599	624.771	fibrillarin
AFLA_048170	270	1675	600	654.482	peptide chain release factor eRF/aRF, subunit 1
AFLA_121580	30	11951	609	2710.66	C-4 methyl sterol oxidase, putative
AFLA_113170	159	1356	610	643.928	iron-sulfur cofactor synthesis protein (Isu1), putative
AFLA_036660	342	1271	610	615.193	lactoylglutathione lyase
AFLA_031820	82	1585	610	695.928	glutathione S-transferase GstA
AFLA_062360	246	1710	611	731.578	FHA domain protein
AFLA_083890	136	3724	616	1038.43	oxidoreductase, zinc-binding dehydrogenase family, putative
AFLA_017010	306	2108	617	736.988	mitochondrial processing peptidase beta subunit, putative
AFLA_084950	78	3221	619	765.952	conserved hypothetical protein
AFLA_027350	372	1424	619	696.566	saccharopine dehydrogenase Lys9, putative
AFLA_099990	126	1820	621	630.277	succinate dehydrogenase subunit Sdh1, putative
AFLA_078380	76	3895	621	1074.24	acetyl-coA hydrolase Ach1, putative
AFLA_028990	43	5727	624	1029.06	conserved hypothetical protein
AFLA_071500	363	2226	624	744.614	translation initiation inhibitor, putative
AFLA_052510	142	1792	624	692.386	WSC domain protein, putative
AFLA_053330	125	11556	626	2313.46	conserved hypothetical protein
AFLA_025090	261	1086	627	615.747	phosphate transporter (Pho88), putative
AFLA_058150	29	2219	629	692.446	myo-inositol-phosphate synthase, putative
AFLA_115170	348	1024	630	653.578	succinyl-CoA synthetase beta subunit, putative
AFLA_037950	464	1963	632	720.373	DMRL synthase family protein
AFLA_134170	291	899	633	596.988	ML domain protein, putative
AFLA_066330	216	9852	634	1351.6	oleate delta-12 desaturase
AFLA_130370	300	2220	637	799.723	conserved hypothetical protein
AFLA_052650	238	6427	639	1031.36	hypothetical protein
AFLA_044090	15	4616	640	905.446	urate oxydase UaZ
AFLA_131310	205	8229	641	1487.53	conserved hypothetical protein
AFLA_094560	150	3521	645	857.651	peptidyl-prolyl cis-trans isomerase/cyclophilin, putative
AFLA_005980	125	1104	646	651.687	endosomal cargo receptor (Erp3), putative
AFLA_129860	48	2302	646	721.096	conserved hypothetical protein
AFLA_086480	345	2516	647	788.458	translational initiation factor 2 beta
AFLA_055770	247	3817	647	921.048	conserved hypothetical protein
AFLA_076890	345	2001	648	811.88	metallopeptidase MepB
AFLA_035620	212	6234	648	1157.57	Hsp70 chaperone BiP/Kar2, putative
AFLA_106880	155	2893	649	1042.19	aldehyde reductase (AKR1), putative
AFLA_119590	295	2686	650	812.398	ubiquinol-cytochrome c reductase iron-sulfur subunit precursor
AFLA_023250	152	6687	650	1842.35	conserved hypothetical protein
AFLA_027390	329	3590	651	938.084	ubiquinol-cytochrome c reductase complex 17 kd protein
AFLA_083920	343	7401	651	1284.35	adenylosuccinate synthetase AdB
AFLA_051540	290	2177	651	808.952	calnexin
AFLA_037470	295	1121	652	644.157	proteasome regulatory particle subunit Rpt4, putative
AFLA_052400	71	8660	652	1567.33	isocitrate lyase AcuD
AFLA_068000	113	3005	653	832.241	60S ribosomal protein L1
AFLA_030890	282	3595	655	829.253	saccharopine dehydrogenase Lys1, putative
AFLA_031090	21	5359	655	1188.7	LEA domain protein
AFLA_111800	125	2764	657	918.169	ornithine decarboxylase
AFLA_136990	395	1685	658	781.024	calcium/calmodulin-dependent protein kinase, putative
AFLA_016830	275	4845	660	1003.2	tubulin subunit TubB
AFLA_037500	330	2100	660	791.386	14-3-3 protein sigma, gamma, zeta, beta/alpha, putative
AFLA_060300	188	1937	664	756.831	Ketol-acid reductoisomerase
AFLA_028470	130	3683	666	765.711	transmembrane protein 14, putative
AFLA_056630	241	6933	666	1142.39	UPF0187 domain membrane protein
AFLA_016660	333	1889	667	694.108	NADH-ubiquinone oxidoreductase 12 kda subunit, putative
AFLA_022440	223	1354	668	716.373	hypothetical protein
AFLA_069380	183	2510	668	725.916	integral membrane protein, Mpv17/PMP22 family, putative
AFLA_112100	16	6895	669	1268.63	conserved hypothetical protein
AFLA_037110	310	1097	670	678.181	proteasome component Pre2, putative
AFLA_028700	237	2665	670	806	ubiquitin UbiA, putative
AFLA_132840	375	1886	671	741.53	Arp2/3 complex subunit (Arp3), putative
AFLA_092500	204	1708	672	712.458	Bax Inhibitor family protein
AFLA_087910	363	2237	673	744.771	conserved hypothetical protein
AFLA_034420	313	4931	674	978.41	leucyl-tRNA synthetase
AFLA_056750	201	1558	674	727.036	carbamoyl-phosphate synthase, small subunit
AFLA_061500	119	4039	678	1229.01	squalene monooxygenase Erg1
AFLA_130360	129	2065	678	719.855	yippee family protein
AFLA_031260	448	13430	681	1755.96	proteasome regulatory particle subunit Rpt3, putative
AFLA_115520	365	1706	681	726.867	Rab GTPase SrgA, putative
AFLA_115350	249	1529	681	662.157	calcium permease family membrane transporter
AFLA_020990	238	6045	681	1108.46	DUF250 domain membrane protein
AFLA_046010	133	1245	682	687.41	eukaryotic translation initiation factor 5, putative
AFLA_029760	192	1081	682	674.036	small monomeric GTPase SarA, putative
AFLA_037930	271	2614	683	978.759	conserved hypothetical protein
AFLA_119310	132	10640	683	1332.17	conserved hypothetical protein
AFLA_069660	243	4357	683	1011.52	TIM-barrel enzyme family protein
AFLA_130070	419	1701	685	790.265	hexokinase Kxk, putative
AFLA_109860	268	12749	686	1714.81	translation elongation factor eEF-1B gamma subunit, putative
AFLA_115440	183	1396	688	701.807	NADH-ubiquinone oxidoreductase 21 kDa subunit, putative
AFLA_050270	69	2580	688	862.855	conserved lysine-rich protein, putative
AFLA_057980	46	3602	689	933.892	conserved hypothetical protein
AFLA_076640	383	2544	689	839.602	phospholipase PldA, putative
AFLA_036370	85	5290	690	1173.59	phosphoenolpyruvate carboxykinase AcuF
AFLA_020840	212	2115	690	779.651	ubiquitin conjugating enzyme (UbcB), putative
AFLA_007000	273	2582	697	834.771	ubiquinol-cytochrome C reductase complex core protein 2, putative
AFLA_069330	175	7545	700	1217.71	nonribosomal peptide synthase Pes1
AFLA_075160	133	12297	705	1822.31	conserved hypothetical protein
AFLA_069770	294	5781	705	1128.01	eukaryotic translation initiation factor 3 subunit EifCh, putative
AFLA_092590	432	2542	706	804.41	peptide methionine sulfoxide reductase
AFLA_055400	294	1093	706	697.108	NADH-ubiquinone oxidoreductase B14 subunit, putative
AFLA_043610	367	2137	707	838.771	enoyl-CoA hydratase/isomerase family protein
AFLA_050540	269	1442	709	795.373	conserved hypothetical protein
AFLA_031360	414	1088	711	726.976	proteasome component Prs2, putative
AFLA_021820	439	2876	711	851.904	nuclear movement protein NudC
AFLA_135790	492	2028	713	830.47	vesicular-fusion protein sec17
AFLA_005150	268	13367	713	2432.35	conserved hypothetical protein
AFLA_136430	518	2388	715	823	V-type ATPase, B subunit, putative
AFLA_098290	464	1667	716	765.699	succinate dehydrogenase cytochrome b560 subunit
AFLA_047350	250	2061	717	757.12	prolidase pepP, putative
AFLA_022640	422	1511	718	751.687	protein O-mannosyl transferase
AFLA_059410	98	4693	720	1004.25	lysophospholipase Plb3
AFLA_121670	4	9778	720	2561.12	hypothetical protein
AFLA_007040	275	3155	721	831.578	homocysteine synthase CysD
AFLA_113020	189	1098	722	707.855	methionine aminopeptidase, type II, putative
AFLA_063300	48	12344	725	3014.9	conserved hypothetical protein
AFLA_026810	380	1318	728	726.651	ubiquitin-protein ligase (Tom1), putative
AFLA_007470	89	13158	729	2324.54	cytochrome P450, putative
AFLA_133030	351	2912	730	842.795	cytochrome c subunit Vb, putative
AFLA_035240	340	1067	733	721.169	proteasome component Pup1, putative
AFLA_099760	110	6567	733	1592.12	conserved hypothetical protein
AFLA_022700	161	2343	733	799.398	SWIRM domain protein Fun19, putative
AFLA_037400	106	4921	736	939.482	conserved hypothetical protein
AFLA_061840	450	1833	736	772.602	aminopeptidase P, putative
AFLA_091420	350	1193	738	728.361	ATP dependent RNA helicase (Sub2), putative
AFLA_112340	384	1154	739	761.434	proteasome component Pre1, putative
AFLA_106310	90	2140	740	848.711	chaperonin, putative
AFLA_030450	48	5255	742	1162.77	trehalose synthase (Ccg-9), putative
AFLA_083230	323	2566	744	931.349	mitochondrial F1F0-ATP synthase g subunit, putative
AFLA_129810	341	1837	745	801.205	cytoplasmic asparaginyl-tRNA synthetase, putative
AFLA_114830	248	1707	745	795.398	aminopeptidase, putative
AFLA_028340	89	11560	745	1846.82	GPI anchored serine-threonine rich protein
AFLA_101290	273	6076	746	1270.43	FAD binding domain protein
AFLA_122720	266	1996	746	792.072	actin binding protein, putative
AFLA_051360	54	5810	747	1185.04	conserved hypothetical protein
AFLA_083880	350	1410	749	764.349	succinate dehydrogenase subunit CybS, putative
AFLA_069030	154	3172	750	941.193	conserved hypothetical protein
AFLA_106750	112	6642	751	2358.93	sugar transporter, putative
AFLA_030580	46	1895	752	788.554	C2H2 transcription factor PacC, putative
AFLA_087350	146	1946	753	813.012	C2H2 transcription factor (Ace1), putative
AFLA_035650	216	5075	755	1160.77	cytochrome P450, putative
AFLA_119330	406	3130	755	934.651	glutathione-S-transferase theta, GST, putative
AFLA_022460	289	1530	755	785.795	dimeric dihydrodiol dehydrogenase, putative
AFLA_088550	329	6037	755	1283.7	phospholipid methyltransferase
AFLA_089170	195	2353	756	858.916	fatty acid synthase alpha subunit FasA
AFLA_026130	302	7331	756	1337.61	conserved hypothetical protein
AFLA_110670	461	1594	756	801.771	thioredoxin, putative
AFLA_086780	428	2278	756	857.398	aspartyl aminopeptidase
AFLA_101930	108	9807	756	2248.63	succinate-semialdehyde dehydrogenase, putative
AFLA_091600	237	13274	757	1747.14	nascent polypeptide-associated complex (NAC) subunit, putative
AFLA_017850	37	5239	757	1289.2	conserved hypothetical protein
AFLA_065220	14	9039	760	1372.14	conserved hypothetical protein
AFLA_085980	252	6128	760	1228.71	regulatory protein SUAPRGA1
AFLA_127350	375	4045	761	1232.98	N-acetylglucosamine-phosphate mutase
AFLA_022880	24	12872	762	2964	oligopeptide transporter, putative
AFLA_099960	314	2075	763	797.964	argininosuccinate lyase
AFLA_133490	296	4286	764	1019.43	aspartyl-tRNA synthetase Dps1, putative
AFLA_008300	460	2047	766	934.205	ubiquitin conjugating enzyme (UbcB), putative
AFLA_098640	154	6676	767	1009.02	isoflavone reductase family protein
AFLA_023480	217	9918	768	1595.28	alpha-amylase, putative
AFLA_073460	379	2652	769	901.169	cyclopropane-fatty-acyl-phospholipid synthase, putative
AFLA_046730	267	2379	770	833.831	conserved hypothetical protein
AFLA_048130	229	1991	777	861.12	mitochondrial intermembrane space translocase subunit Tim10, putative
AFLA_111290	150	7069	779	1721.31	conserved hypothetical protein
AFLA_011760	173	1702	780	807.783	NADH-ubiquinone oxidoreductase 178 kDa subunit, putative
AFLA_047270	499	2952	781	990.084	beta-1,6-glucan boisynthesis protein (Knh1), putative
AFLA_049020	122	3263	781	1131.1	acyl-CoA dehydrogenase family protein
AFLA_122400	32	6568	782	1585.63	glucan 1,4-alpha-glucosidase, putative
AFLA_074940	16	12343	784	3328.2	viral-enhancing factor, putative
AFLA_011770	287	4445	785	1456.75	conserved hypothetical protein
AFLA_028160	375	2478	785	892.687	ubiquitin conjugating enzyme (MmsB), putative
AFLA_138870	192	10093	787	1952.83	conserved hypothetical protein
AFLA_067950	467	1684	789	856.084	COPII-coated vesicle protein SurF4/Erv29, putative
AFLA_079150	335	3505	790	955.277	valyl-tRNA synthetase
AFLA_022630	426	3341	796	966.398	secretion related GTPase SrgD
AFLA_086820	306	2562	797	955.59	pyruvate dehydrogenase complex component Pdx1, putative
AFLA_134290	213	1558	798	824.084	proteasome component Pup2, putative
AFLA_071520	305	1996	800	816.072	conserved hypothetical protein
AFLA_125860	180	10202	800	2284.18	alcohol dehydrogenase, putative
AFLA_052550	434	2541	800	928.916	threonyl-tRNA synthetase, putative
AFLA_109930	416	1684	800	851.831	D-lactate dehydrogenase, putative
AFLA_041700	27	13355	805	2589.65	ferric-chelate reductase, putative
AFLA_025080	255	5376	806	1125.4	histone H2A
AFLA_136040	330	2227	806	905.373	chitin synthase, putative
AFLA_081280	414	1689	809	875.771	Ras GTPase Rab11, putative
AFLA_092130	458	1376	811	863.169	phenylalanyl-tRNA synthetase beta chain cytoplasmic
AFLA_061880	322	5096	812	1129.86	pyridoxine biosynthesis protein
AFLA_103650	211	4048	815	1426.28	aldose 1-epimerase, putative
AFLA_113940	349	4656	817	1084.2	conserved hypothetical protein
AFLA_043840	198	1998	818	822.892	RNA helicase (Dbp), putative
AFLA_139270	71	8052	818	1645.04	aflNa/ hypD/ hypothetical protein
AFLA_054810	518	1215	820	820.916	transcriptional repressor TupA/RocA, putative
AFLA_087480	239	2353	821	838.892	FKBP-type peptidyl-prolyl isomerase, putative
AFLA_118500	8	6985	822	1770.13	period circadian protein, putative
AFLA_027300	441	1533	823	847.41	vacuolar ATPase 98 kDa subunit, putative
AFLA_052000	180	2274	825	866.964	COPII-coated vesicle membrane protein, putative
AFLA_037940	383	1611	826	817.699	proteasome subunit alpha type 3, putative
AFLA_044330	116	3352	827	1023.7	ketoreductase
AFLA_139470	105	12673	827	2641.43	FAD dependent oxidoreductase, putative
AFLA_100650	154	12982	828	2687.7	serine carboxypeptidase (CpdS), putative
AFLA_003890	529	2736	830	939.133	proteasome component Pre6, putative
AFLA_018800	1	6936	830	1669.54	nitrite reductase NiiA
AFLA_012240	382	1369	833	863.59	conserved hypothetical protein
AFLA_130170	505	2165	834	902.675	actin cortical patch component, putative
AFLA_075610	202	7696	835	2080.84	conserved hypothetical protein
AFLA_080630	175	6587	835	1262.59	NADH-quinone oxidoreductase Pst2, putative
AFLA_031760	123	4468	838	1089.46	glutaminase, putative
AFLA_069950	588	13070	838	1823.93	Hsc70 cochaperone (SGT), putative
AFLA_069360	430	2672	841	933.651	26 proteasome complex subunit Sem1, putative
AFLA_045020	162	1798	841	848.108	aspartate transaminase, putative
AFLA_119300	6	9112	842	1578.8	conserved hypothetical protein
AFLA_015450	385	1260	843	832.337	V-ATPase proteolipid subunit Ppa1, putative
AFLA_092630	316	4286	845	1065.83	cell wall glucanase (Utr2), putative
AFLA_092730	528	3470	846	1029.24	26S proteasome regulatory subunit Mts4, putative
AFLA_071660	329	2787	849	1156.61	xylitol dehydrogenase
AFLA_099900	235	3900	849	1148.37	integral membrane protein
AFLA_034030	170	1954	849	895.06	trehalose-phosphate synthase/phosphatase complex subunit Tps1
AFLA_029880	179	11162	850	2340.07	FAD dependent oxidoreductase, putative
AFLA_034250	97	5211	850	1313.88	integral membrane protein
AFLA_046230	26	7656	851	2218.89	amino acid permease (Dip5), putative
AFLA_112410	322	1548	851	865	proteasome component Pup3, putative
AFLA_036640	231	5218	852	1229.23	PH domain protein
AFLA_030650	220	6851	854	2057.48	dihydrodipicolinate synthetase family protein
AFLA_078900	228	3144	856	1036.9	beta-N-acetylhexosaminidase NagA, putative
AFLA_026540	286	2141	856	882.241	sphinganine-1-phosphate aldolase BST1, putative
AFLA_030970	400	2615	858	959.482	homoserine dehydrogenase
AFLA_113570	410	1468	859	893.614	mitochondrial carrier protein, putative
AFLA_036270	489	2044	861	1006.45	lysyl-tRNA synthetase
AFLA_042090	31	4222	863	1179.37	Fasciclin domain family protein
AFLA_067360	405	6852	864	1446.31	translation elongation factor EF-Tu, putative
AFLA_119610	110	3353	864	1001.9	stress response RCI peptide, putative
AFLA_081430	335	1853	865	865.446	eukaryotic translation initiation factor 3 subunit EifCb, putative
AFLA_022370	289	2984	865	980.892	conserved hypothetical protein
AFLA_113980	359	1563	866	871.747	cyclin dependent kinase inhibitor Pho81, putative
AFLA_076840	335	1589	868	873.133	proteasome component Pre8, putative
AFLA_099480	455	2437	868	990.325	NADH-ubiquinone oxidoreductase 9.5 kDa subunit, putative
AFLA_131830	43	11008	868	2295.61	MFS monosaccharide transporter, putative
AFLA_008480	195	7100	869	1492.13	CFEM domain protein
AFLA_021700	9	2886	870	941.096	aminotransferase, class V, putative
AFLA_119670	314	2216	874	966.458	glycogen branching enzyme GbeA, putative
AFLA_032470	380	5475	874	1472.9	phosphoglycolate phosphatase, putative
AFLA_097370	28	4221	876	1170.75	conserved hypothetical protein
AFLA_067420	480	1655	877	922.639	NADH-ubiquinone oxidoreductase 14 kDa subunit, putative
AFLA_007050	192	4216	878	1138.94	conserved hypothetical protein
AFLA_055190	431	1408	878	880.072	proteasome component Pre5, putative
AFLA_000870	14	7834	878	1828.51	hypothetical protein
AFLA_061920	435	3204	879	1055.63	protein transport protein Sec61 alpha subunit, putative
AFLA_013690	360	1386	880	848.096	chitin synthase C
AFLA_128990	445	5327	881	1215.52	ubiquitin conjugating enzyme Ubc8, putative
AFLA_043590	350	2884	882	987.602	mitochondrial genome maintenance protein Mgr2, putative
AFLA_041770	373	2915	887	980.602	conserved hypothetical protein
AFLA_041400	18	12716	889	3934	hypothetical protein
AFLA_092750	305	1688	890	880.94	LON domain serine protease, putative
AFLA_049080	328	6554	891	1330.64	biotin synthase, putative
AFLA_109160	225	2127	891	995.687	isopentenyl-diphosphate delta-isomerase
AFLA_049370	488	2715	892	1053.16	short-chain dehydrogenase/reductase family protein, putative
AFLA_129790	299	10926	895	1492.1	conserved hypothetical protein
AFLA_100770	295	1643	897	888.12	conserved hypothetical protein
AFLA_127810	262	2849	897	1034.82	CBS and PB1 domain protein
AFLA_014810	430	6514	898	1366.51	prolyl-tRNA synthetase
AFLA_051220	255	1984	898	921.361	conserved hypothetical protein
AFLA_028450	437	4114	898	1204.3	glutamate carboxypeptidase, putative
AFLA_094090	120	7339	902	1967.76	conserved hypothetical protein
AFLA_097890	63	8107	902	2062.6	Glycosyl hydrolases family 32 superfamily
AFLA_067380	477	1915	902	998.795	nucleoside diphosphatase Gda1
AFLA_079850	137	3387	903	1134.49	phosphatidyl synthase
AFLA_026340	515	1520	904	937.566	C6 finger domain protein, putative
AFLA_134810	398	6599	906	1457.53	adenylosuccinate lyase Ade13, putative
AFLA_014520	46	7339	906	2230.07	multicopper oxidase, putative
AFLA_056440	211	5824	906	1282.2	conserved hypothetical protein
AFLA_071470	387	3546	909	1057.29	adenine phosphoribosyltransferase 1
AFLA_128500	421	2237	909	956.289	5'-methylthioadenosine phosphorylase (Meu1), putative
AFLA_115200	323	2248	910	975.386	xanthine-guanine phosphoribosyl transferase Xpt1, putative
AFLA_050600	162	3794	911	1162.24	betaine-aldehyde dehydrogenase, putative
AFLA_018140	432	1566	911	926.892	mannose-6-phosphate isomerase, class I
AFLA_080130	398	1452	913	909.145	protein transport protein Sec23, putative
AFLA_081380	314	2848	914	1065.75	cytochrome C1/Cyt1, putative
AFLA_067450	372	1790	914	964.012	glycine cleavage system H protein
AFLA_076180	9	11255	915	3332.92	conserved hypothetical protein
AFLA_029440	207	3528	915	1221.39	NADH-cytochrome b5 reductase, putative
AFLA_078310	301	4288	915	1221.05	hypothetical protein
AFLA_014930	236	1925	916	928.843	cofactor for methionyl- and glutamyl-tRNA synthetase, putative
AFLA_103250	436	1899	917	988.229	proteasome regulatory particle subunit (RpnC), putative
AFLA_026140	4	11848	918	3311.34	alpha-amylase, putative
AFLA_022690	337	1558	921	889.458	LEM3/CDC50 family protein
AFLA_119540	240	4350	921	1156.37	phosphomevalonate kinase
AFLA_131470	402	2693	923	960.711	eukaryotic translation initiation factor 3 subunit EifCd, putative
AFLA_068280	381	2314	924	943.157	cop-coated vesicle membrane protein P24, putative
AFLA_048270	446	1851	925	987.699	ubiquitin ligase subunit HrtA, putative
AFLA_071390	380	3305	926	1099.12	mRNA binding post-transcriptional regulator (Csx1), putative
AFLA_102410	61	10524	927	2202.47	conserved hypothetical protein
AFLA_025210	440	2006	928	1001.53	NADH-ubiquinone oxidoreductase
AFLA_078400	732	1644	928	964.976	protein phosphatase PP2A regulatory B subunit, putative
AFLA_028310	170	11052	929	2798.34	conserved hypothetical protein
AFLA_044800	13	11478	930	2428.98	conidiation protein Con-6, putative
AFLA_006580	492	8824	930	1285.07	WW domain protein
AFLA_092900	540	1685	931	976.12	oxidative stress protein Svf1, putative
AFLA_099050	16	5452	931	1369.05	conserved hypothetical protein
AFLA_081340	417	2785	931	1039.36	glycogen debranching enzyme Gdb1, putative
AFLA_086400	517	1849	938	969.205	isocitrate dehydrogenase Idp1, putative
AFLA_032220	446	1998	940	1022.11	DNA damage response protein (Dap1), putative
AFLA_070690	435	1354	941	924.265	cystathionine gamma-synthase
AFLA_087710	99	6869	942	1941.35	GPR/FUN34 family protein
AFLA_006350	120	5688	942	1725.06	thioredoxin reductase, putative
AFLA_046990	451	3582	945	1225.19	APSES transcription factor StuA
AFLA_088870	368	2046	946	1035.86	porphobilinogen synthase, putative
AFLA_068790	265	3846	946	1181.58	adenylylsulfate kinase
AFLA_133580	257	9596	947	1524.33	casein kinase I, putative
AFLA_098880	351	1792	948	976.916	Bax Inhibitor family protein
AFLA_056170	81	6324	951	1488.89	spore-specific catalase CatA
AFLA_087950	307	2926	952	1122.81	isocitrate dehydrogenase LysB
AFLA_043930	43	6526	953	1552.57	MFS phosphate transporter, putative
AFLA_011560	116	4902	954	1655.69	phosphatidylglycerol specific phospholipase, putative
AFLA_014800	514	4353	956	1199.71	t-complex protein 1, alpha subunit, putative
AFLA_007830	73	11917	957	3470.14	conserved hypothetical protein
AFLA_092950	738	2327	957	1001.86	vacuolar ATP synthase subunit D, putative
AFLA_130440	310	1656	958	936.566	hypothetical protein
AFLA_131060	324	3076	959	1207.9	14-alpha sterol demethylase Cyp51B
AFLA_099210	229	13097	959	2139.33	conserved hypothetical protein
AFLA_077840	77	13232	959	3209.9	endoglucanase, putative
AFLA_112260	481	3395	960	1095.99	CaaX prenyl protease Ste24
AFLA_047450	355	1821	962	985.711	gamma-glutamyl phosphate reductase
AFLA_048020	586	2188	963	1028	D-3-phosphoglycerate dehydrogenase
AFLA_035120	434	2018	964	993.072	conserved hypothetical protein
AFLA_068340	652	5499	967	1283.48	cell wall biogenesis protein phosphatase Ssd1, putative
AFLA_109990	581	1480	968	961.361	SNARE protein Ykt6, putative
AFLA_086420	463	1833	968	1010.88	eukaryotic translation initiation factor 3 subunit 2i, putative
AFLA_077860	433	5510	971	1651.35	conserved hypothetical protein
AFLA_034160	641	4297	973	1167.33	protein transport protein Sec24, putative
AFLA_107860	235	6905	973	1552.33	conserved hypothetical protein
AFLA_048650	591	3071	975	1296.01	sexual development transcription factor SteA
AFLA_003110	264	4388	978	1109.25	cyanate hydratase, putative
AFLA_083640	400	2856	978	1158.48	3-isopropylmalate dehydrogenase Leu2A
AFLA_133060	271	3869	979	1183.35	conserved hypothetical protein
AFLA_079480	445	2851	980	1177.17	oligopeptidase family protein
AFLA_103730	452	2594	980	1040.8	alpha,alpha-trehalose-phosphate synthase subunit Tps2, putative
AFLA_040800	255	10507	981	2118.87	conserved hypothetical protein
AFLA_049290	269	5923	982	1470.29	citrate synthase Cit1, putative
AFLA_077560	257	10122	982	1377.73	choline transport protein, putative
AFLA_133020	426	4631	982	1237.89	MYB DNA-binding domain protein
AFLA_139460	201	12696	983	2602.18	MFS multidrug transporter, putative
AFLA_025750	381	1980	983	1020.39	t-complex protein 1, theta subunit, putative
AFLA_057740	267	5809	984	1350.72	aldehyde dehydrogenase, putative
AFLA_112130	529	4319	985	1201.49	clathrin heavy chain
AFLA_036170	437	2487	986	1040.96	t-complex protein 1, epsilon subunit, putative
AFLA_086410	467	1963	986	1030.99	C1 tetrahydrofolate synthase, putative
AFLA_091230	553	3381	987	1141.54	ubiquitin conjugating enzyme (UbcM), putative
AFLA_085140	14	11347	987	2052.22	extracellular thaumatin domain protein, putative
AFLA_032890	170	5572	988	1287.93	conserved hypothetical protein
AFLA_112070	531	6791	990	1648.54	UPF0041 domain protein
AFLA_076670	572	1531	992	1002.4	guanyl-nucleotide exchange factor (Sec7), putative
AFLA_099380	341	2632	995	1133.83	conserved hypothetical protein
AFLA_058110	449	6234	999	1692.49	Cupin domain protein
AFLA_027030	552	10490	1000	1699.75	NADH-ubiquinone oxidoreductase, subunit F, putative
AFLA_133690	291	6358	1000	1383.11	PA and RING finger domain protein
AFLA_012400	33	3934	1003	1143.76	None
AFLA_085090	432	2106	1003	1011.81	integral plasma membrane protein, putative
AFLA_015180	91	5279	1007	1424.13	conserved hypothetical protein
AFLA_007810	86	12629	1008	4408.1	gibberellin 20-oxidase family protein
AFLA_084160	508	4457	1008	1226.24	DUF1014 domain protein
AFLA_137960	432	1852	1009	1019.6	arginyl-tRNA synthetase
AFLA_104020	446	4401	1010	1296.29	conserved hypothetical protein
AFLA_006310	530	2136	1015	1026.18	alpha glucosidase II, alpha subunit, putative
AFLA_091190	748	2562	1015	1104.24	ubiquitin C-terminal hydrolase, putative
AFLA_073500	562	2239	1016	1086.24	conserved hypothetical protein
AFLA_135020	417	2319	1017	1056.55	lectin family integral membrane protein, putative
AFLA_106570	390	1884	1018	1074.77	cullin binding protein CanA, putative
AFLA_080670	77	9537	1019	2636.95	conserved hypothetical protein
AFLA_080750	671	4539	1020	1339.27	ARP2/3 complex 34 kDa subunit , putative
AFLA_111750	493	5662	1020	1321.08	RAB GTPase Ypt5, putative
AFLA_050760	319	3298	1022	1188.02	peptidyl-prolyl cis-trans isomerase
AFLA_094180	68	6881	1023	1711.12	conserved hypothetical protein
AFLA_022120	358	2582	1023	1052.34	c-24(28) sterol reductase
AFLA_103850	650	1733	1024	1075.65	condensin complex component cnd1
AFLA_080320	161	5092	1024	1178.36	conserved hypothetical protein
AFLA_017750	93	10182	1026	2960.94	conserved hypothetical protein
AFLA_138640	186	10938	1026	1804.87	choline transport protein, putative
AFLA_026950	67	3681	1027	1292.64	3-ketoacyl-coA thiolase peroxisomal A precursor
AFLA_057390	413	5829	1027	1449.53	ribosome biogenesis ABC transporter Arb1, putative
AFLA_087630	174	5640	1029	1273.48	alpha,alpha-trehalose-phosphate synthase subunit, putative
AFLA_037080	415	3601	1030	1097.19	conserved hypothetical protein
AFLA_127260	547	1472	1031	1027.45	cop9 signalosome complex subunit, putative
AFLA_018090	573	4937	1032	1369.84	Arp2/3 complex subunit (Arp2), putative
AFLA_098490	486	1801	1033	1027.08	conserved hypothetical protein
AFLA_132390	441	2698	1033	1185.87	oxidoreductase, short chain dehydrogenase/reductase family
AFLA_049940	403	3674	1037	1186.04	G1/S-specific cyclin Pcl5, putative
AFLA_056330	498	3386	1038	1300.05	amidophosphoribosyltransferase
AFLA_103640	14	7789	1040	1586.57	C6 transcription factor (Fcr1), putative
AFLA_088620	468	3031	1041	1116.93	UPF0160 domain protein MYG1, putative
AFLA_093280	553	5017	1042	1287.36	disulfide isomerase (TigA), putative
AFLA_128850	57	8192	1042	1636.39	conserved hypothetical protein
AFLA_056850	573	1983	1044	1107.47	electron transfer flavoprotein, beta subunit, putative
AFLA_086170	425	3120	1047	1189.45	proteasome regulatory particle subunit (RpnL), putative
AFLA_086990	185	10438	1047	2250.05	cell wall protein, putative
AFLA_032920	265	3085	1048	1124.22	conserved hypothetical protein
AFLA_042690	361	2030	1048	1041.7	conserved hypothetical protein
AFLA_131760	516	2325	1048	1059.88	UPF0041 domain protein
AFLA_020140	442	2540	1048	1111.45	NADH-ubiquinone oxidoreductase B18 subunit, putative
AFLA_029710	631	5728	1048	1501.45	proliferating cell nuclear antigen (PCNA)
AFLA_061950	309	2170	1050	1020.04	autophagocytosis protein Aut1, putative
AFLA_069850	466	4385	1051	1334.48	glycerol dehydrogenase Gcy1, putative
AFLA_073850	581	3553	1052	1235.53	TBC domain protein, putative
AFLA_033040	120	12595	1053	1702.29	conserved hypothetical protein
AFLA_044000	580	1982	1053	1091.64	COPI vesicle coat beta' subunit, putative
AFLA_100790	825	2050	1054	1199.08	proteasome regulatory particle subunit (RpnE), putative
AFLA_095870	353	6230	1055	1097.45	conserved hypothetical protein
AFLA_048410	403	2832	1055	1003.1	BAR adaptor protein RVS161, putative
AFLA_000860	106	11596	1055	2329.69	tripeptidyl peptidase A
AFLA_007860	124	6828	1056	2105.33	oligopeptide transporter, putative
AFLA_135240	67	4277	1059	1436.95	carnitine acetyl transferase
AFLA_096010	122	13454	1060	2697.59	conserved hypothetical protein
AFLA_060100	372	7927	1060	2247.06	hypothetical protein
AFLA_068730	400	1864	1060	1070.16	ubiquitin-like modifier SUMO, putative
AFLA_024860	276	5078	1061	1498.67	MATH and UCH domain protein, putative
AFLA_051390	313	2923	1061	1211.07	copper-transporting ATPase, putative
AFLA_068460	159	2794	1063	1170.76	conserved hypothetical protein
AFLA_054840	390	2770	1066	1150.33	glycogen synthase kinase (Skp1), putative
AFLA_134680	154	3886	1072	1368.48	C2H2 transcription factor (Crea), putative
AFLA_129740	332	1940	1072	1077.87	ubiquitin C-terminal hydrolase L3
AFLA_109350	409	2612	1073	1171.2	NADPH cytochrome P450 reductase (CprA), putative
AFLA_019650	40	7587	1074	1840.08	phosphoketolase, putative
AFLA_056100	171	4248	1074	1584.46	cell cycle checkpoint protein (Hus1), putative
AFLA_027550	464	7293	1075	1692.54	hypothetical protein
AFLA_002200	56	10389	1076	2695.02	esterase, putative
AFLA_012270	681	2829	1077	1229.94	peptidyl-prolyl cis-trans isomerase, putative
AFLA_018950	384	1853	1079	1072.57	conserved hypothetical protein
AFLA_048060	545	1759	1079	1054.17	class V myosin (Myo4), putative
AFLA_047160	359	6603	1079	1389.33	cytochrome b5, putative
AFLA_052530	439	1824	1083	1110.29	phosphatidylserine synthase
AFLA_032870	569	2561	1084	1154.49	cAMP-dependent protein kinase regulatory subunit PkaR
AFLA_127460	618	2234	1086	1166.24	SNF7 family protein
AFLA_136030	439	12125	1087	1978.2	chitin synthase ChsE
AFLA_095570	394	4484	1087	1278.42	RNA annealing protein Yra1, putative
AFLA_093990	217	5677	1088	1912.71	arylsulfatase, putative
AFLA_128900	373	6053	1090	1454.05	3'(2'),5'-bisphosphate nucleotidase
AFLA_092350	655	1957	1090	1152.75	proteasome regulatory particle subunit (RpnK), putative
AFLA_021250	239	5175	1092	1400.14	mitochondrial 2-oxodicarboxylate carrier protein, putative
AFLA_056350	301	3482	1092	1269.11	2-methylcitrate dehydratase, putative
AFLA_062220	594	2673	1094	1176.86	high osmolarity signaling protein Sho1, putative
AFLA_067060	288	2361	1095	1080.18	NADH-ubiquinone oxidoreductase 19 kDa subunit, putative
AFLA_026260	414	1976	1099	1105.75	small nuclear ribonucleoprotein SmD3, putative
AFLA_047880	270	2559	1099	1136.59	transcription elongation factor, putative
AFLA_017300	114	10727	1102	2135.13	cytochrome P450 oxidoreductase OrdA-like, putative
AFLA_093800	690	1976	1103	1133.13	small nuclear ribonucleoprotein SmD2, putative
AFLA_137010	635	2676	1104	1227.58	NADH-ubiquinone oxidoreductase 49 kDa subunit, putative
AFLA_124820	293	4783	1108	1641.83	conserved hypothetical protein
AFLA_024950	541	1895	1108	1149.35	ARP2/3 complex subunit Arc18, putative
AFLA_085840	444	3563	1109	1210.96	tubulin-specific chaperone c, putative
AFLA_012250	296	1711	1110	1088.4	conserved hypothetical protein
AFLA_058570	449	2088	1111	1226.99	ATP dependent RNA helicase (Dbp5), putative
AFLA_018260	574	2512	1113	1154.7	DUF543 domain protein
AFLA_021160	51	8812	1114	1721.23	aldehyde reductase (AKR1), putative
AFLA_074980	677	2223	1116	1187.59	splicing factor u2af large subunit
AFLA_098100	604	2521	1117	1205.02	tRNA splicing protein (Spl1), putative
AFLA_044350	261	2070	1119	1116.87	TOR pathway phosphatidylinositol 3-kinase TorA
AFLA_112270	555	3708	1121	1301.64	translation initiation factor EF-2 gamma subunit, putative
AFLA_041760	396	3249	1121	1268.73	conserved hypothetical protein
AFLA_086440	393	1854	1121	1114.61	SH3 domain protein
AFLA_005810	592	4986	1122	1505.9	septin
AFLA_015220	560	2617	1122	1315.31	cell wall biogenesis protein/glutathione transferase (Gto1), putative
AFLA_112990	756	2169	1122	1149.02	UBX domain protein, putative
AFLA_119040	42	8580	1123	2393.14	muramidase, putative
AFLA_045100	93	2584	1123	1257.61	conserved hypothetical protein
AFLA_078960	455	4308	1129	1349.58	small nuclear ribonucleoprotein SmG, putative
AFLA_021000	405	3934	1130	1304.14	conserved hypothetical protein
AFLA_085270	549	5162	1130	1353.55	t-complex protein 1, zeta subunit, putative
AFLA_063310	81	12409	1131	3466.25	conserved hypothetical protein
AFLA_054860	472	5003	1132	1432.67	mitochondrial import receptor subunit (tom40), putative
AFLA_048490	356	2769	1132	1202.93	translation initiation factor eIF-6, putative
AFLA_031310	156	3314	1134	1264.11	arsenite translocating ATPase ArsA, putative
AFLA_049930	614	2184	1136	1151.31	conserved hypothetical protein
AFLA_084450	591	4456	1136	1310.82	conserved hypothetical protein
AFLA_017830	443	2823	1137	1135.72	small nuclear ribonucleoprotein complex protein Nhp2, putative
AFLA_087620	332	3363	1138	1279.57	NmrA family transcriptional regulator, putative
AFLA_112670	205	3331	1139	1364.63	conserved hypothetical protein
AFLA_055600	626	2628	1140	1208.92	ARD/ARD family protein, putative
AFLA_093910	447	2176	1140	1170.73	hydroxyacylglutathione hydrolase, putative
AFLA_138850	98	8375	1140	2211.01	facilitated glucose transporter, putative
AFLA_130700	449	2377	1143	1147.18	oca3 protein, putative
AFLA_123690	37	10523	1143	2463.63	extracellular arabinanase, putative
AFLA_103790	624	6555	1143	1642.71	chitin synthase activator (Chs3), putative
AFLA_029000	88	7997	1144	1671.61	conserved hypothetical protein
AFLA_004660	538	4379	1145	1484.17	glycogen synthase Gsy1, putative
AFLA_048610	524	2571	1145	1248.98	succinyl-CoA synthetase alpha subunit, putative
AFLA_014050	500	2118	1148	1205.92	pyrroline-5-carboxylate reductase
AFLA_007240	422	3580	1148	1259.53	mitochondrial 37S ribosomal protein S27, putative
AFLA_083100	317	2559	1150	1229.1	bZIP transcription factor (LziP), putative
AFLA_002510	300	3322	1152	1222.31	actin monomer binding protein, putative
AFLA_066280	395	3057	1153	1415.82	conserved hypothetical protein
AFLA_041030	317	3525	1155	1211.45	aldo-keto reductase, putative
AFLA_108860	15	6102	1155	1648.77	1,3-beta-glucanosyltransferase Gel2
AFLA_056280	13	5523	1156	1548.52	conserved hypothetical protein
AFLA_108410	297	11443	1157	1819.61	dipeptidase, putative
AFLA_103660	387	2539	1159	1157.07	nicotinate-nucleotide pyrophosphorylase
AFLA_008390	310	2592	1159	1227.88	conserved hypothetical protein
AFLA_048000	653	1723	1159	1181.06	Rheb small monomeric GTPase RhbA
AFLA_027290	262	2438	1160	1231.37	proteasome activator subunit 4, putative
AFLA_095210	623	5635	1161	1680.89	methionine aminopeptidase, type I, putative
AFLA_105130	521	1661	1162	1146.11	conserved hypothetical protein
AFLA_058980	60	10658	1163	3139.43	conserved hypothetical protein
AFLA_129610	235	2321	1166	1145.48	NADH-ubiquinone oxidoreductase 64 kDa subunit, putative
AFLA_080860	502	4737	1169	1543.86	conserved hypothetical protein
AFLA_126880	559	3348	1171	1269.39	FKBP-type peptidyl-prolyl isomerase, putative
AFLA_100120	201	13216	1171	2414.34	hypothetical protein
AFLA_055910	649	1741	1172	1165.95	CLPTM1 domain protein
AFLA_097470	71	12840	1172	3547.45	benzoate 4-monooxygenase cytochrome P450, putative
AFLA_086660	306	3697	1173	1206.83	mitochondrial phosphate carrier protein, putative
AFLA_111190	35	5521	1174	1982.99	acyl-CoA dehydrogenase, putative
AFLA_045750	288	5986	1176	1501.41	antigenic mitochondrial protein HSP60, putative
AFLA_083370	285	2479	1177	1230.61	glutathione oxidoreductase Glr1, putative
AFLA_036080	421	10201	1178	2610.17	fumarylacetoacetate hydrolase FahA
AFLA_026290	557	3637	1181	1440.16	phosphotransmitter protein Ypd1, putative
AFLA_037490	608	1859	1183	1158.36	eukaryotic translation initiation factor 3 subunit EifCj, putative
AFLA_064970	45	5655	1184	1606.33	benzodiazepine receptor family protein
AFLA_026530	521	3664	1185	1550.87	homocitrate synthase
AFLA_067130	641	3046	1186	1326.75	conserved hypothetical protein
AFLA_125270	5	7887	1187	3007.35	tyrosinase
AFLA_134050	627	5030	1189	1581.51	PHD finger and SET domain protein, putative
AFLA_017960	659	2184	1189	1245.88	prohibitin complex subunit Phb1, putative
AFLA_084460	14	3087	1189	1188.11	heat shock protein Hsp98/Hsp104/ClpA, putative
AFLA_029600	64	6071	1189	2028.3	D-xylose reductase (Xyl1), putative
AFLA_021670	613	1861	1190	1202.22	ubiquitin-protein ligase (Rsp5), putative
AFLA_129960	614	2120	1190	1240.82	oligosaccharyl transferase subunit (alpha), putative
AFLA_036410	177	2478	1191	1173.86	peroxisomal biogenesis factor (PEX11), putative
AFLA_011440	172	13257	1191	4742.83	endoglucanase, putative
AFLA_112190	213	2161	1192	1168.83	cyclophilin, putative
AFLA_023500	109	11621	1195	2460.92	extracellular conserved serine-rich protein
AFLA_034320	834	4056	1198	1337.52	HIT domain protein
AFLA_132370	502	5008	1198	1398.34	molybdopterin binding domain protein
AFLA_084750	720	3614	1201	1280.84	peptidase D, putative
AFLA_052660	680	6632	1201	1593.36	hypothetical protein
AFLA_050070	500	3278	1202	1362.9	nucleotide-sugar transporter, putative
AFLA_014710	731	2348	1203	1308.82	karyopherin alpha subunit, putative
AFLA_104050	553	2721	1204	1243.49	autophagy cysteine endopeptidase Atg4, putative
AFLA_012460	308	3439	1205	1321.28	None
AFLA_137290	500	2413	1206	1204.86	splicing factor 3B subunit 1, putative
AFLA_128580	725	2792	1207	1424.4	NADH-ubiquinone oxidoreductase 304 kDa subunit precursor
AFLA_028140	738	3591	1208	1405.43	Vacuolar protein sorting-associated protein 26, putative
AFLA_062170	156	3353	1214	1341.8	AI-BP family protein
AFLA_113730	428	3266	1215	1334.54	progesterone binding protein, putative
AFLA_090910	257	5144	1217	1471.98	MADS box transcription factor Mcm1
AFLA_006110	594	2551	1217	1313.63	conserved hypothetical protein
AFLA_011800	93	3813	1217	1387.19	conserved hypothetical protein
AFLA_010950	336	6608	1218	1543.82	cytochrome P450 oxidoreductase, putative
AFLA_090890	801	1718	1218	1221.8	ATP synthase subunit E, putative
AFLA_045860	555	3347	1220	1352.33	NADH-ubiquinone dehydrogenase 24 kDa subunit, putative
AFLA_079680	771	2408	1220	1301.52	vesicular fusion ATPase, putative
AFLA_036250	838	3953	1220	1456.02	GDP-mannose pyrophosphorylase A
AFLA_068800	568	1855	1222	1204.11	vacuolar ATP synthase subunit c
AFLA_062020	521	2395	1222	1188.46	conserved hypothetical protein
AFLA_052590	660	3310	1224	1326.49	metal homeostatis protein bsd2
AFLA_122590	738	2666	1227	1340.66	RNA binding protein Tma22, putative
AFLA_013360	442	3105	1228	1262.78	glutamine-serine-proline rich protein, putative
AFLA_085280	496	3472	1228	1205.55	pre-rRNA processing nucleolar protein Sik1, putative
AFLA_018930	791	2749	1229	1315.7	adenylyl cyclase-associated protein (cap)
AFLA_081730	347	4652	1229	1488.4	integral membrane protein
AFLA_049010	464	4113	1230	1517	conserved hypothetical protein
AFLA_106390	601	3283	1230	1355.08	ribose 5-phosphate isomerase A
AFLA_099080	14	13467	1234	3049.84	conserved hypothetical protein
AFLA_135890	283	2574	1234	1235.18	protein transport protein (SEC31), putative
AFLA_001900	316	5197	1236	1412.78	sulfatase domain protein
AFLA_099490	490	4397	1236	1453.93	oligosaccharyl transferase subunit (beta), putative
AFLA_008310	459	5234	1238	1789.2	acetyl-CoA-acetyltransferase, putative
AFLA_014360	860	1837	1239	1257.04	protein phosphatase 2A catalytic subunit Pph21, putative
AFLA_051680	196	6219	1239	1793.51	conserved hypothetical protein
AFLA_133520	745	3744	1242	1367.89	Coatomer subunit gamma, putative
AFLA_032290	49	9367	1243	1582.78	conserved serine-rich protein
AFLA_071000	542	2270	1243	1223.18	membrane bound C2 domain protein (vp115), putative
AFLA_007110	172	2979	1244	1304.8	peroxisomal membrane protein Pmp47, putative
AFLA_067100	3	3898	1247	1378.94	mitochondrial hypoxia responsive domain protein
AFLA_002980	362	6534	1249	2109.23	N,N-dimethylglycine oxidase
AFLA_127820	512	1928	1249	1240.95	importin beta-3 subunit, putative
AFLA_052220	435	2886	1249	1334.24	DUF907 domain protein
AFLA_054770	412	3345	1253	1425.08	conserved hypothetical protein
AFLA_037860	544	3111	1255	1420.75	rRNA processing protein (Rrp20), putative
AFLA_044620	259	3176	1258	1406.51	mitochondrial Hsp70 chaperone (Ssc70), putative
AFLA_033640	669	7767	1258	1832.59	26S proteasome non-ATPase regulatory subunit Nas2, putative
AFLA_031070	787	2950	1259	1329.29	Hsp40 co-chaperone Jid1, putative
AFLA_093370	674	4979	1261	1737.69	ribonucleotide reductase small subunit RnrA, putative
AFLA_040330	6	7996	1262	3135.65	chitin binding domain protein Peritrophin-A, putative
AFLA_127740	415	4838	1263	1460.82	metacaspase CasA
AFLA_068560	610	2749	1263	1306.25	Mago nashi domain protein
AFLA_128250	626	2332	1263	1323.19	mitochondrial protein, putative
AFLA_044710	513	2856	1264	1369.66	eukaryotic translation initiation factor 3 subunit EifCg, putative
AFLA_018230	172	7353	1267	2414.42	short-chain dehydrogenase, putative
AFLA_120990	551	5471	1268	1543.83	O-methyltransferase, putative
AFLA_033100	513	4678	1269	1633.06	phosphatidylinositol transporter, putative
AFLA_112160	414	2591	1270	1227.29	conserved hypothetical protein
AFLA_055970	425	3223	1270	1419.53	fad NAD binding oxidoreductase, putative
AFLA_134160	567	2032	1272	1281.1	V-type ATPase F subunit, putative
AFLA_103010	352	2697	1273	1293.78	dsDNA-binding protein PDCD5, putative
AFLA_111210	705	2387	1274	1318.28	26S proteasome regulatory subunit Rpn2, putative
AFLA_130040	328	13209	1275	2435.47	ammonium transporter MeaA
AFLA_025330	27	9537	1277	3011.14	hypothetical protein
AFLA_062390	609	2752	1278	1358.48	tryptophanyl-tRNA synthetase
AFLA_068190	540	3849	1279	1423.2	CORD and CS domain protein
AFLA_078690	499	5336	1281	1763.69	RNA interference and gene silencing protein (Qde2), putative
AFLA_015060	207	6912	1281	2110.61	phytanoyl-CoA dioxygenase family protein
AFLA_093050	480	4560	1284	1645.58	conserved hypothetical protein
AFLA_070470	6	12155	1285	2874.06	conserved hypothetical protein
AFLA_022590	497	3239	1286	1323.29	YdiU domain protein
AFLA_102810	643	3077	1288	1382.16	Rho GTPase Rac, putative
AFLA_042210	39	12445	1288	3507.33	conserved hypothetical protein
AFLA_012030	134	6893	1289	2496.65	DUF895 domain membrane protein
AFLA_092990	366	1831	1289	1226.54	protein kinase c
AFLA_115400	807	2001	1290	1313.81	nuclear pore protein (Nic96), putative
AFLA_075940	418	2560	1291	1313.61	conserved hypothetical protein
AFLA_046820	478	4644	1291	1562.75	tubulin-specific chaperone Rbl2, putative
AFLA_033400	118	6122	1293	1654.46	mannosidase MsdS
AFLA_117870	422	4023	1294	1452.39	thiosulfate sulfurtransferase, putative
AFLA_117680	630	2890	1295	1381.24	conserved hypothetical protein
AFLA_069320	193	8867	1295	2217.31	ABC multidrug transporter, putative
AFLA_132360	590	2806	1295	1340.06	glial factor naturation factor, putative
AFLA_104060	629	2713	1296	1319.77	R3H and G-patch domain protein, putative
AFLA_027140	403	3083	1302	1351.98	ADAM family of metalloprotease ADM-B
AFLA_050940	804	5819	1305	1709.46	phenylalanyl-tRNA synthetase, beta subunit
AFLA_058760	224	9172	1305	2363.05	cytochrome P450, putative
AFLA_088660	364	4953	1306	1624.4	DUF431 domain protein
AFLA_043630	103	5792	1308	1789.78	conserved hypothetical protein
AFLA_128130	476	2387	1313	1312.37	adenylate cyclase AcyA
AFLA_047260	743	2584	1314	1325.01	SRP receptor beta subunit (Srp102), putative
AFLA_004970	434	6121	1314	1701.11	fatty acid elongase (Gns1), putative
AFLA_113800	498	2930	1315	1402.18	branched-chain amino acid aminotransferase, cytosolic
AFLA_084820	364	3587	1316	1531.02	acyl-CoA dehydrogenase, putative
AFLA_032090	190	2889	1316	1445.05	conserved hypothetical protein
AFLA_037510	243	2364	1316	1327.1	endoplasmic reticulum calcium ATPase, putative
AFLA_091630	769	4785	1316	1649.93	phospholipase, putative
AFLA_093660	87	7993	1317	2007.17	solid-state culture expressed protein (Aos23), putative
AFLA_066960	353	5617	1317	1866.41	hypothetical protein
AFLA_004920	785	5482	1318	1596.71	phosphoribosylformylglycinamidine synthase
AFLA_087640	367	7138	1318	1648.9	alpha,alpha-trehalose phosphate synthase subunit, putative
AFLA_002420	421	3286	1320	1462.49	DUF298 domain protein
AFLA_003260	645	2281	1321	1355.86	rhomboid family membrane protein
AFLA_080160	313	2756	1321	1317.71	UDP-N-acetylglucosaminyltransferase
AFLA_100000	556	1910	1322	1243.95	proteasome regulatory particle subunit Rpt1, putative
AFLA_020520	377	3475	1324	1439.94	ribosomal protein S15, putative
AFLA_043010	366	7218	1325	2541.81	formamidase FmdS
AFLA_109320	393	7227	1326	2183.77	3-hydroxyisobutyrate dehydrogenase
AFLA_100830	358	4775	1329	1763.05	NIPSNAP family protein
AFLA_076930	782	3712	1329	1450.48	importin, putative
AFLA_092090	23	6089	1330	2096.07	oxidoreductase, short-chain dehydrogenase/reductase family
AFLA_039600	307	7068	1332	1795.01	conserved hypothetical protein
AFLA_044160	796	5372	1333	1699.41	prephenate dehydrogenase
AFLA_038700	172	12735	1333	3690.05	conserved hypothetical protein
AFLA_036320	214	5426	1334	1859.9	cytochrome c oxidase assembly protein cox15
AFLA_115530	364	13162	1336	2378.18	C-4 methyl sterol oxidase, putative
AFLA_127320	378	3190	1337	1342.78	riboflavin synthase, alpha subunit
AFLA_128660	642	3648	1337	1413.35	ubiquitin-protein ligase Ufd4, putative
AFLA_007090	530	2595	1338	1411.51	WW domain protein, putative
AFLA_033410	13	11474	1340	2740.17	conserved hypothetical protein
AFLA_117770	984	6674	1341	1694.31	DnaJ domain protein
AFLA_115300	579	3042	1341	1421.41	mitochondrial outer membrane protein (Sam50), putative
AFLA_044230	462	4974	1342	1613.65	eukaryotic translation initiation factor 3 subunit EifCl, putative
AFLA_134340	815	5662	1342	1600.94	BAR domain protein
AFLA_044790	3	6590	1343	1897.49	conidiation-specific family protein
AFLA_006120	667	2029	1344	1351.4	glutamine dependent NAD+ synthetase, putative
AFLA_103160	408	4790	1344	1562.02	conserved hypothetical protein
AFLA_088060	748	3082	1348	1412.77	endosomal cargo receptor (Erv14), putative
AFLA_058610	531	4613	1348	1666.73	HLH transcription factor, putative
AFLA_006750	711	4350	1350	1637.18	vacuolar aspartyl aminopeptidase Lap4, putative
AFLA_025990	899	2571	1350	1437.67	clathrin light chain
AFLA_103700	717	3476	1350	1350.64	integral membrane protein, putative
AFLA_081360	797	7328	1352	1773.23	Phe-inhibited DAHP synthase AroG
AFLA_047080	684	6245	1353	1732.41	cytosolic hydroxymethyltransferase, putative
AFLA_129910	716	3157	1355	1470.08	Rho GTPase ModA, putative
AFLA_086900	133	6757	1355	1757.84	alpha-mannosidase
AFLA_051140	116	10303	1356	2929.2	beta-glucosidase, putative
AFLA_083550	529	2069	1357	1292.34	Coatomer subunit delta, putative
AFLA_133190	701	3903	1357	1590.07	F-box domain protein
AFLA_015030	379	3989	1358	1457.88	mitotic spindle checkpoint protein (Mad2B), putative
AFLA_076450	644	2646	1358	1338.73	electron transfer flavoprotein alpha subunit, putative
AFLA_050590	142	8862	1361	2377.46	conserved hypothetical protein
AFLA_032510	602	11908	1362	2782.72	galactokinase
AFLA_112720	585	3066	1362	1476.08	diphosphomevalonate decarboxylase
AFLA_024630	614	4025	1363	1624.49	conserved hypothetical protein
AFLA_095970	594	3531	1363	1540.18	Hsp70 chaperone Hsp88
AFLA_088850	714	3977	1363	1640.12	exportin KapK
AFLA_046380	513	2003	1363	1320.07	RING finger membrane protein
AFLA_026280	491	3468	1364	1482.14	phosphatase-like protein (PTPLA), putative
AFLA_131420	422	2755	1364	1355.67	uridylate kinase Ura6
AFLA_015350	754	2953	1370	1543.81	aldehyde dehydrogenase family protein, putative
AFLA_024100	383	12606	1371	3067.86	conserved hypothetical protein
AFLA_128960	383	5581	1372	1958.99	oxidoreductase, short-chain dehydrogenase/reductase family
AFLA_085700	822	3859	1372	1621.93	arsenate reductase (Arc2), putative
AFLA_085430	647	3534	1375	1539.94	prenylcysteine lyase, putative
AFLA_099040	648	3869	1377	1471.98	ABC bile acid transporter, putative
AFLA_093160	718	2242	1377	1378.23	Rab small monomeric GTPase Rab7, putative
AFLA_008450	151	6855	1377	2304.41	conserved hypothetical protein
AFLA_055240	725	6619	1381	1875.08	bifunctional purine biosynthetic protein Ade1, putative
AFLA_091880	663	4197	1381	1573.67	septin AspA, putative
AFLA_115380	380	3985	1383	1501.58	protein tyrosine phosphatase (Pyp1), putative
AFLA_065080	588	4519	1383	1581.22	phosphoglucomutase, putative
AFLA_044300	851	2791	1385	1451.3	SH3 domain protein
AFLA_103360	726	2297	1390	1471.58	RNA processing protein Emg1, putative
AFLA_075150	457	4176	1390	1546.83	esterase, putative
AFLA_113010	232	5404	1391	1881.95	sphingolipid desaturase, putative
AFLA_059450	487	3204	1392	1479.3	conserved hypothetical protein
AFLA_024080	548	11398	1394	2575.8	cytochrome p450, putative
AFLA_091900	859	2082	1394	1385.53	vacuolar ATPase proteolipid subunit c, putative
AFLA_133440	357	3425	1396	1456.4	conserved hypothetical protein
AFLA_001290	585	13065	1396	2103.1	oligopeptide transporter, putative
AFLA_051710	525	6393	1397	1788.64	histidyl-tRNA synthetase, mitochondrial precursor
AFLA_067960	433	3900	1400	1500.29	conserved hypothetical protein
AFLA_134090	271	4383	1401	1585.1	3-isopropylmalate dehydratase, putative
AFLA_111080	940	2649	1403	1467.1	AT DNA binding protein (Thy28), putative
AFLA_043950	876	3479	1406	1554.22	serine/threonine protein kinase (YPK1), putative
AFLA_117450	102	11273	1408	3513.88	conserved hypothetical protein
AFLA_016910	806	2228	1409	1400.27	26S proteasome regulatory subunit S5A
AFLA_036110	270	11039	1409	2817.23	4-hydroxyphenylpyruvate dioxygenase, putative
AFLA_068740	429	3776	1410	1420.19	conserved hypothetical protein
AFLA_071420	921	2737	1412	1455.66	TRAPP complex component Bet3, putative
AFLA_022390	519	2884	1414	1487.76	mitochondrial GTP/GDP transporter Ggc1, putative
AFLA_060890	200	4766	1414	1508.28	amino acid transporter, putative
AFLA_128330	184	6083	1414	1633.19	UMTA methyltransferase family protein
AFLA_053250	533	5506	1416	1718.22	conserved hypothetical protein
AFLA_044130	644	4150	1418	1840.49	conserved hypothetical protein
AFLA_092240	302	7431	1419	1692.61	calcium/calmodulin-dependent protein kinase, putative
AFLA_080570	750	3555	1420	1540.34	F-actin capping protein beta subunit
AFLA_017130	564	3971	1421	1614.47	nuclear segregation protein (Bfr1), putative
AFLA_107200	817	4886	1421	1754.27	F-actin capping protein alpha subunit, putative
AFLA_073550	412	2723	1422	1427.4	small nuclear ribonucleoprotein (LSM5), putative
AFLA_081880	219	5019	1423	1603.48	branched-chain amino acid aminotransferase
AFLA_081750	716	5097	1423	1664.29	t-complex protein 1, beta subunit, putative
AFLA_129150	312	3258	1424	1433.11	conserved hypothetical protein
AFLA_093200	773	3266	1424	1534.57	alpha-1,2-mannosyltransferase (Kre5), putative
AFLA_060650	767	6278	1429	1798.54	glutaminyl-tRNA synthetase
AFLA_093210	536	3543	1429	1541.59	conserved hypothetical protein
AFLA_048640	883	2531	1431	1533.29	conserved hypothetical protein
AFLA_048200	513	3440	1431	1435.02	pseudouridylate synthase family protein
AFLA_005970	681	2499	1431	1418.12	ubiquitin C-terminal hydrolase, putative
AFLA_027460	240	5535	1433	1908.36	C2H2 finger domain protein, putative
AFLA_033520	316	2170	1433	1418.71	ubiquitin-like protein DskB, putative
AFLA_034710	218	5456	1434	2004.71	conserved hypothetical protein
AFLA_029670	645	4584	1434	1437.16	translocon protein Sec61beta, putative
AFLA_039250	203	10929	1435	2643.92	hypothetical protein
AFLA_048230	892	2606	1435	1505.42	Golgi GDP-mannose transporter
AFLA_063290	339	8232	1440	2903.16	conserved hypothetical protein
AFLA_034170	837	2846	1440	1497.35	MAP kinase FUS3/KSS1
AFLA_130690	692	2354	1442	1476.28	AP-3 complex subunit delta, putative
AFLA_036440	10	5459	1442	1783.55	alanine aminotransferase, putative
AFLA_020760	747	4538	1444	1645.45	t-complex protein 1, gamma subunit (Cct3), putative
AFLA_068580	724	2742	1445	1513.55	vesicle-mediated transport protein Vid24, putative
AFLA_028230	439	5254	1445	1952.7	G2/M-specific cyclin NimE
AFLA_050080	283	2308	1445	1424.51	conserved hypothetical protein
AFLA_136830	25	3978	1448	1630.1	aromatic aminotransferase Aro8, putative
AFLA_046740	300	6116	1448	1798.22	NADP-dependent malic enzyme MaeA
AFLA_071180	182	6952	1448	1937.67	indoleamine 2,3-dioxygenase family protein
AFLA_029680	458	3596	1449	1636.46	conserved hypothetical protein
AFLA_043040	280	4575	1449	1521.05	peptidyl-prolyl cis-trans isomerase Cpr7, putative
AFLA_101230	2	8758	1449	2810.17	glutaminase GtaA
AFLA_103860	381	3681	1449	1502.64	oxysterol binding protein (Orp8), putative
AFLA_122710	752	3109	1450	1574.28	dynamin-like GTPase Dnm1, putative
AFLA_011740	244	3338	1450	1535.9	cystathionine gamma-lyase
AFLA_118290	378	5255	1452	1670.39	nucleoside transporter, putative
AFLA_034870	44	6574	1453	2333.93	conserved hypothetical protein
AFLA_131410	705	3244	1453	1546.78	PCI domain protein
AFLA_005860	954	3028	1454	1537.27	chromatin assembly factor 1 subunit C, putative
AFLA_045270	294	3512	1454	1583.96	cytochrome P450 family protein, putative
AFLA_111960	546	7619	1455	1951.86	conserved hypothetical protein
AFLA_061990	189	11739	1457	2877.6	conserved hypothetical protein
AFLA_078790	403	5055	1458	1831.28	conserved hypothetical protein
AFLA_071610	310	4499	1459	1475.52	oxysterol-binding protein 1A, putative
AFLA_088310	778	3394	1464	1598.43	hypothetical protein
AFLA_022650	313	2643	1465	1442.59	MFS monosaccharide transporter, putative
AFLA_078810	372	4824	1465	1771.66	oxidoreductin
AFLA_007700	204	13406	1465	2833.35	conserved hypothetical protein
AFLA_029250	444	4241	1467	1644.88	PSP1 domain protein
AFLA_079800	837	3722	1468	1631.94	conserved hypothetical protein
AFLA_020350	618	5268	1471	1735.23	translation initiation factor 2 alpha subunit, putative
AFLA_071630	245	5238	1471	1770.2	polysaccharide synthase Cps1, putative
AFLA_137480	297	3715	1471	1546.57	SH3 domain protein
AFLA_073680	208	6435	1474	2159.52	alcohol dehydrogenase, putative
AFLA_111260	85	6789	1474	1769.76	mannose-6-phosphate isomerase, class I
AFLA_019490	507	7118	1475	1897.51	ThiJ/PfpI family protein
AFLA_052610	475	7257	1478	2278.55	succinyl-CoA:3-ketoacid-coenzyme A transferase (ScoT), putative
AFLA_030160	695	3950	1479	1577.61	uroporphyrinogen decarboxylase
AFLA_112440	715	2768	1479	1562.33	endosomal cargo receptor (Erp5), putative
AFLA_031600	418	2637	1481	1512.8	SNARE-dependent exocytosis protein (Sro7), putative
AFLA_067010	328	5573	1482	2097.48	carnitine acetyl transferase
AFLA_011270	153	8195	1482	2433.01	zinc-containing alcohol dehydrogenase, putative
AFLA_114040	574	2867	1484	1515.83	para-hydroxybenzoate-polyprenyltransferase Coq2, putative
AFLA_085910	808	7312	1484	1970.71	Coatomer subunit alpha, putative
AFLA_023070	701	5635	1486	1954.99	integral membrane protein
AFLA_026250	505	4243	1487	1713.23	homeobox transcription factor (RfeB), putative
AFLA_031330	196	5412	1487	1855.67	conserved hypothetical protein
AFLA_100020	484	6486	1490	1698.48	conserved hypothetical protein
AFLA_067600	624	6235	1492	1850.94	nuclear and cytoplasmic polyadenylated RNA-binding protein pub1
AFLA_101800	33	8038	1493	3133.25	class III chitinase, putative
AFLA_101010	482	3985	1495	1610.33	aspartate-semialdehyde dehydrogenase
AFLA_088770	811	2823	1496	1527.33	guanylate kinase
AFLA_031620	771	2917	1497	1557.63	histone chaperone ASF1, putative
AFLA_134750	639	3882	1498	1692.93	conserved hypothetical protein
AFLA_102890	857	2793	1500	1556.77	conserved hypothetical protein
AFLA_103040	847	3952	1501	1685.84	protein mannosyltransferase 1
AFLA_030460	524	2391	1505	1552.92	ADP-ribosylation factor 6, putative
AFLA_030180	588	4642	1506	1667.72	protein mitochondrial targeting protein (Mas1), putative
AFLA_113250	589	5120	1509	1737.53	ribonucleotide reductase large subunit Rnr1, putative
AFLA_111720	306	2382	1509	1468.14	peptide N-myristoyl transferase (Nmt1)
AFLA_105660	585	4435	1510	1630.07	mitochondrial import inner membrane translocase subunit TIM23, putative
AFLA_130410	549	2695	1510	1494.89	autophagy ubiquitin-activating enzyme ApgG, putative
AFLA_056070	346	11321	1511	2872.33	MFS sugar transporter, putative
AFLA_034370	41	6613	1513	2102.13	hypothetical protein
AFLA_019050	703	7067	1519	1992.71	conserved hypothetical protein
AFLA_047250	121	9642	1519	2278.06	short chain dehydrogenase/reductase, putative
AFLA_045310	910	6494	1521	2011.37	HVA22 domain membrane protein
AFLA_067530	528	3703	1524	1535.77	chitin biosynthesis protein (Chs7), putative
AFLA_069790	979	5062	1525	1820.22	casein kinase 2 beta' regulatory subunit Ckb2, putative
AFLA_132670	741	3707	1527	1733.82	quinone oxidoreductase, putative
AFLA_031380	116	5109	1527	1717.75	class V chitinase, putative
AFLA_069440	176	5563	1528	2004.06	pyridoxal reductase (AKR8), putative
AFLA_100670	138	2552	1531	1436.82	ATP sulphurylase
AFLA_086300	371	2759	1532	1520.71	vacuolar import and degRadation protein, putative
AFLA_029640	364	3576	1532	1638.36	dynein light chain type 1, putative
AFLA_052570	895	6665	1533	1917.57	MAP kinase MpkA
AFLA_121360	129	6140	1533	1774.46	conserved hypothetical protein
AFLA_034640	76	9246	1534	2988.45	aminopeptidase Y, putative
AFLA_045850	652	4835	1535	1824.45	conserved hypothetical protein
AFLA_135550	1008	4855	1538	1802.64	protein kinase regulator (Mob1), putative
AFLA_100840	1094	6226	1539	1845.72	pyridoxamine phosphate oxidase, putative
AFLA_073210	95	10411	1539	3170.81	oxalate decarboxylase, putative
AFLA_132930	313	2966	1539	1506.51	secretory pathway protein Ssp120, putative
AFLA_093640	823	2895	1540	1576.19	U6 small nuclear ribonucleoprotein (Lsm3), putative
AFLA_113920	459	2531	1540	1499.54	translation initiation regulator (Gcn20), putative
AFLA_029820	746	4076	1542	1630.55	SAM domain protein
AFLA_008190	79	7252	1542	2002.4	conserved hypothetical protein
AFLA_076800	428	6471	1542	2471.16	amidohydrolase family protein
AFLA_069410	600	4495	1543	1843.17	RNase L inhibitor of the ABC superfamily, putative
AFLA_029390	598	4689	1543	1730.3	HMG box protein, putative
AFLA_114860	513	4875	1544	1815.63	conserved hypothetical protein
AFLA_028060	368	2808	1544	1608.3	anthranilate phosphoribosyltransferase, putative
AFLA_113790	262	10154	1545	2365.58	conserved hypothetical protein
AFLA_113890	716	2403	1546	1516.64	nuclear pore complex subunit (SEC13), putative
AFLA_134120	821	6809	1546	1972.02	orotate phosphoribosyltransferase
AFLA_021630	527	3718	1547	1661.46	conserved hypothetical protein
AFLA_084400	569	3271	1548	1595.42	conserved hypothetical protein
AFLA_020650	588	3176	1549	1666.43	YjgH family protein
AFLA_034380	145	6885	1549	1906.93	catalase, putative
AFLA_106800	528	6544	1551	2142.61	guanine deaminase, putative
AFLA_085350	541	4939	1551	1847.8	AMMECR1 family protein
AFLA_036130	113	10900	1552	2669.19	14-alpha sterol demethylase Cyp51A
AFLA_004200	260	12973	1554	2677.88	GPI anchored glycoprotein, putative
AFLA_076830	541	4639	1556	1926.01	RING finger domain protein
AFLA_046480	724	2807	1558	1597.78	DNA directed RNA polymerase II 15 kDa subunit, putative
AFLA_030340	421	6070	1559	1720.42	RING finger domain protein, putative
AFLA_002410	841	3587	1559	1593.04	integral membrane protein 25D9-6
AFLA_115260	752	2637	1559	1578.75	ubiquinone biosynthesis protein, putative
AFLA_088840	663	2927	1561	1600.6	ppp1r11-prov protein, putative
AFLA_036430	704	2140	1564	1521.93	proteasome regulatory particle subunit (RpnG), putative
AFLA_090500	59	4124	1565	1683.9	mitochondrial phosphate carrier protein, putative
AFLA_044580	414	13179	1566	2680.19	conserved hypothetical protein
AFLA_033270	689	6667	1566	1972.83	DNA-dependent RNA polymerase II largest subunit, putative
AFLA_130110	1093	3288	1567	1674.36	hypothetical protein
AFLA_093250	662	4720	1568	1776.37	MYND domain protein (SamB), putative
AFLA_061230	572	5828	1568	1968.53	oxidoreductase, short-chain dehydrogenase/reductase family
AFLA_129600	878	3615	1568	1773.49	conserved hypothetical protein
AFLA_013980	799	3371	1571	1535.84	aminopeptidase, putative
AFLA_054720	264	4873	1572	1817.87	conserved hypothetical protein
AFLA_139490	173	11405	1573	3518.23	hybrid PKS/NRPS enzyme, putative
AFLA_127380	745	4071	1574	1703.76	trimethyllysine dioxygenase TmlH, putative
AFLA_006430	889	2184	1576	1527.06	mitochondrial import protein, putative
AFLA_045970	484	7580	1576	2126.46	vacuolar transporter chaperone (Vtc4), putative
AFLA_116960	646	5347	1576	2062.3	conserved hypothetical protein
AFLA_032770	766	4771	1577	1734.07	dihydroneopterin aldolase domain protein
AFLA_031810	617	6322	1578	1979.64	zinc knuckle splicing factor Zfm1
AFLA_103340	593	13022	1578	3337.41	glyoxalase family protein
AFLA_067680	563	4163	1582	1837.86	mucin, putative
AFLA_071360	557	6483	1582	2067.04	zinc knuckle nucleic acid binding protein, putative
AFLA_044480	389	4132	1583	1659.93	DNA replication licensing factor Mcm7, putative
AFLA_010890	340	4683	1586	1574.83	sterol desaturase, putative
AFLA_043240	806	4947	1588	1871.92	prefoldin subunit 3, putative
AFLA_115360	486	4670	1589	1789.42	FGGY-family carbohydrate kinase, putative
AFLA_089280	893	4362	1590	1765.25	SNF7 family protein Fti1/Did2, putative
AFLA_074520	362	11512	1590	3481.47	alpha-galactosidase, putative
AFLA_013710	41	4660	1592	1694.07	conserved hypothetical protein
AFLA_032200	309	3874	1595	1710.13	coiled-coil domain-containing protein, putative
AFLA_024510	141	10332	1596	3370.22	MFS quinate transporter, putative
AFLA_086470	293	13461	1597	2848.92	DUF124 domain protein
AFLA_131530	605	2785	1599	1557.71	CCAAT-binding transcription factor subunit HAPB
AFLA_020260	560	2671	1599	1569	cation transporting ATPase, putative
AFLA_051550	803	6211	1600	1821.94	class II aldolase/adducin domain protein
AFLA_079140	755	4096	1600	1870.69	casein kinase, putative
AFLA_019520	567	5130	1600	1970.25	conserved hypothetical protein
AFLA_131260	1150	2915	1601	1715.07	conserved hypothetical protein
AFLA_134830	245	3469	1601	1577.7	phospholipase A2 (PlaA), putative
AFLA_012170	570	2465	1601	1578.93	U5 snRNP component Snu114, putative
AFLA_040150	670	3664	1602	1721.54	GABA permease (Uga4), putative
AFLA_022080	546	6083	1604	1868.35	conserved hypothetical protein
AFLA_122630	735	4655	1606	1692.54	cytidine deaminase, putative
AFLA_127750	642	7047	1607	2023.67	t-complex protein 1, eta subunit, putative
AFLA_015420	475	4500	1607	1761.06	sulfite reductase, putative
AFLA_044450	605	4096	1607	1659.12	conserved hypothetical protein
AFLA_051770	264	5969	1607	1780.9	thioredoxin reductase Trr1/Trr2, putative
AFLA_127370	701	2883	1608	1719.34	histone H4 arginine methyltransferase RmtA
AFLA_088260	650	3268	1608	1633.22	eukaryotic translation initiation factor 3 subunit EifCf, putative
AFLA_076480	273	6126	1609	2256.04	glutathione S-transferase, putative
AFLA_056810	270	5021	1610	1827.25	carboxypeptidase S1, putative
AFLA_028050	326	2443	1610	1565.12	metallothionein-I gene transcription activator
AFLA_006840	755	3088	1613	1681.98	ubiquitin conjugating enzyme (UbcH), putative
AFLA_025120	884	4185	1615	1725.52	histone deacetylase, putative
AFLA_113450	338	2780	1615	1562.4	bZIP transcription factor (MetR), putative
AFLA_039180	258	13063	1615	4436.05	MFS gliotoxin efflux transporter GliA
AFLA_019690	287	5629	1617	2092.66	3-ketoacyl-CoA ketothiolase (Kat1), putative
AFLA_091030	722	4504	1618	1866.52	conserved hypothetical protein
AFLA_032370	585	5695	1618	2012.42	Rho GTPase Rho 2, putative
AFLA_091260	340	6766	1621	2010.4	glucosamine 6-phosphate acetyltransferase, putative
AFLA_060580	1008	2844	1621	1657.34	NEDD8 conjugating enzyme (UbcL), putative
AFLA_057410	410	5234	1621	1852.13	NAD binding Rossmann fold oxidoreductase, putative
AFLA_034210	1087	3085	1621	1667.37	proteasome regulatory particle subunit (RpnI), putative
AFLA_012190	453	3866	1621	1663.94	C6 finger domain protein, putative
AFLA_061530	552	2999	1622	1611.2	DUF914 domain membrane protein
AFLA_076100	623	4655	1622	1850.36	conserved hypothetical protein
AFLA_039470	372	4579	1624	1893.78	membrane bound cation transporter, putative
AFLA_006100	132	4417	1625	1849.29	HypA-like protein, putative
AFLA_033530	578	7135	1625	1908.63	nuclear mRNA splicing factor, putative
AFLA_050350	718	5189	1626	1853.17	conserved hypothetical protein
AFLA_012080	142	9273	1627	3213.48	glucosamine-6-phosphate deaminase, putative
AFLA_005950	168	6141	1630	1955.63	stress response RCI peptide, putative
AFLA_097200	768	3358	1632	1662.01	short-chain dehydrogenases/reductase, putative
AFLA_114990	880	3085	1632	1729.05	DEAD helicases superfamily protein (Aquarius), putative
AFLA_079470	567	3579	1632	1575.93	pre-mRNA splicing helicase, putative
AFLA_086640	355	5932	1633	1942.93	conserved hypothetical protein
AFLA_050210	360	5170	1634	1819.63	conserved hypothetical protein
AFLA_035210	587	3602	1634	1727.58	KH domain RNA binding protein
AFLA_069100	639	3752	1636	1695.24	homeobox transcription factor, putative
AFLA_080970	702	3049	1637	1662.87	RNA-binding protein, putative
AFLA_048080	675	3820	1637	1794.87	conserved hypothetical protein
AFLA_081560	309	3816	1638	1549.28	presequence translocase-associated motor subunit Pam17, putative
AFLA_082500	328	6969	1639	2125.04	sphinganine hydroxylase Sur2, putative
AFLA_050040	339	4416	1642	1695.11	DnaJ domain protein
AFLA_134820	983	3614	1644	1758.95	Exocyst complex component Exo70, putative
AFLA_022340	455	5339	1645	1980.43	glutamate synthase Glt1, putative
AFLA_073290	103	7678	1645	2162.76	phospho-2-dehydro-3-deoxyheptonate aldolase
AFLA_028960	269	3502	1645	1599.29	calcium ion transporter Vcx1, putative
AFLA_107300	691	6260	1645	2142.98	3-hydroxyanthranilate 3,4-dioxygenase Bna1, putative
AFLA_086490	960	2972	1646	1658.46	conserved hypothetical protein
AFLA_088430	797	6207	1647	2001.87	protein kinase activator (Mob2), putative
AFLA_072380	77	10891	1648	2502.57	conserved hypothetical protein
AFLA_041440	118	7531	1648	2173.3	dienelactone hydrolase
AFLA_135820	164	3326	1648	1637.24	urease accessory protein UreG, putative
AFLA_120260	66	7388	1649	2337.6	nitroreductase family protein, putative
AFLA_084660	830	7284	1649	2188.94	2-isopropylmalate synthase
AFLA_011610	501	4400	1650	1963.43	conserved hypothetical protein
AFLA_131750	490	3783	1651	1802	NADH-ubiquinone oxidoreductase 105 kDa subunit
AFLA_058330	423	5352	1652	1826.67	mitochondrial intermembrane space translocase subunit Tim9, putative
AFLA_076050	623	3807	1653	1675.66	cellular morphogenesis protein (Rax2), putative
AFLA_022030	808	12016	1655	2612.13	glutathione-S-transferase theta, GST, putative
AFLA_076070	494	5760	1656	1975.96	septin AspB
AFLA_129340	706	3206	1657	1780.9	conserved hypothetical protein
AFLA_017400	794	3850	1658	1831.01	SAGA-like transcriptional regulatory complex subunit Spt3, putative
AFLA_136720	7	11177	1662	2455.45	conserved hypothetical protein
AFLA_046050	928	5956	1663	2059.53	GDSL Lipase/Acylhydrolase family protein
AFLA_042080	1040	3262	1664	1785.8	poly(A)-binding protein-dependent poly(A) ribonuclease, putative
AFLA_106560	128	4312	1665	1845.71	zinc finger protein ZPR1
AFLA_029280	850	3002	1669	1757.71	ubiquitin-protein ligase (Hul4), putative
AFLA_088790	691	4711	1670	1894.75	DUF814 domain protein, putative
AFLA_088590	351	2882	1671	1562.41	nuclear pore complex protein (SonA), putative
AFLA_012210	515	2751	1672	1622.12	conserved hypothetical protein
AFLA_127440	755	3386	1674	1710.34	cAMP-dependent protein kinase-like, putative
AFLA_059520	572	4356	1675	1893.73	hypothetical protein
AFLA_032760	389	5267	1677	1976.65	pre-RNA splicing factor Srp2, putative
AFLA_103830	645	2789	1679	1638.66	OTU-like cysteine protease, putative
AFLA_116810	367	11661	1680	2748.58	alpha-1,3-glucan synthase Ags3
AFLA_048120	600	3706	1680	1795.95	cell cycle control protein Cwf14/Bud31, putative
AFLA_037630	779	6779	1683	2214.89	prenylated RAB acceptor, putative
AFLA_048040	598	3464	1684	1776.89	P-type ATPase, putative
AFLA_055210	882	3077	1686	1716.65	conserved hypothetical protein
AFLA_064500	188	5889	1688	1973.1	conserved hypothetical protein
AFLA_041690	57	13224	1691	3679.77	cysteine synthase B, putative
AFLA_003230	618	4829	1691	1756.34	conserved hypothetical protein
AFLA_112080	758	6612	1692	2137.89	small nuclear ribonucleoprotein SmB, putative
AFLA_054820	332	4421	1692	1954.47	sterol delta 5,6-desaturase ERG3
AFLA_056720	797	3281	1693	1788.16	protein kinase (Gcn2), putative
AFLA_073510	620	3976	1693	1859.77	conserved hypothetical protein
AFLA_103410	673	6963	1694	2098.89	eukaryotic translation initiation factor subunit eIF2A, putative
AFLA_051600	1103	5586	1695	1935.77	ubiquitination network signaling protein, putative
AFLA_078720	879	2860	1697	1731.46	peroxisomal targeting receptor pex5, putative
AFLA_030770	1013	2815	1697	1729.98	beta-N-acetylglucosaminidase, putative
AFLA_092640	1127	2311	1698	1667.73	alkaline phosphatase Pho8
AFLA_105320	594	3641	1699	1809.61	phosphoserine aminotransferase
AFLA_106670	589	3482	1699	1861.19	tip120, putative
AFLA_128080	581	10331	1700	3603.34	conserved hypothetical protein
AFLA_067000	242	7898	1700	2376.4	SCP-like extracellular protein, putative
AFLA_015360	590	3307	1701	1737.35	N-methyltransferase, putative
AFLA_138050	436	9509	1702	3115.41	flavonoid 3-hydroxylase, putative
AFLA_071290	666	3079	1702	1780.84	Ran-binding protein (RanBP10), putative
AFLA_085170	283	3928	1703	1827.1	C6 transcription factor OefC
AFLA_123880	248	12401	1704	2284.76	D-aminopeptidase, putative
AFLA_116190	18	8818	1705	3145.71	conserved hypothetical protein
AFLA_003090	77	12083	1705	3483.36	conserved hypothetical protein
AFLA_044640	686	3257	1706	1666.16	fatty acid activator Faa4, putative
AFLA_119780	50	7425	1707	3233.66	neutral protease 2 precursor, putative
AFLA_078610	456	6049	1707	2038.89	conserved hypothetical protein
AFLA_074620	61	8349	1709	3460.94	sodium/phosphate symporter, putative
AFLA_017880	290	5760	1709	1966.69	conserved hypothetical protein
AFLA_093530	507	9160	1712	2429.05	oxidoreductase, 2OG-Fe(II) oxygenase family
AFLA_131520	780	6496	1713	2068.65	arsenite resistance protein Ars2, putative
AFLA_097330	347	12608	1714	3668.04	sugar transporter, putative
AFLA_006860	837	3296	1715	1780.83	oxidosqualene:lanosterol cyclase
AFLA_020670	699	4255	1715	1897.28	conserved hypothetical protein
AFLA_021580	551	5280	1716	2016.42	dynein light chain (Tctex1), putative
AFLA_080620	885	5558	1717	2022.12	endoplasmic reticulum and nuclear membrane proteinc Npl4, putative
AFLA_102960	967	8727	1718	2328.39	hypothetical protein
AFLA_032280	769	5381	1718	2060.71	conserved hypothetical protein
AFLA_136610	490	5649	1719	1863.9	conserved hypothetical protein
AFLA_044500	445	6620	1719	2110.55	YjeF domain protein
AFLA_052190	492	7025	1720	2112.02	conserved hypothetical protein
AFLA_113100	988	5874	1721	2047.69	N-glycosyl-transferase
AFLA_018160	680	2598	1722	1735.67	Coatomer subunit epsilon, putative
AFLA_034520	406	3186	1723	1719.12	RING finger protein
AFLA_020460	916	2214	1724	1699.89	vacuolar ATP synthase subunit d, putative
AFLA_070810	170	6141	1725	2456.86	cholinesterase, putative
AFLA_054660	128	5109	1725	1665.7	aspartic-type endopeptidase (OpsB), putative
AFLA_069730	1026	3358	1726	1716.57	HMG box protein, putative
AFLA_021920	246	13274	1727	3576.63	cellular morphogenesis protein Boi1-like, putative
AFLA_130470	1078	5090	1729	1974.02	quinone oxidoreductase, putative
AFLA_135960	330	3079	1729	1717.96	arginine-tRNA-protein transferase 1
AFLA_008380	1066	7385	1729	2265.66	ubiquitin conjugating enzyme, putative
AFLA_087210	587	12707	1730	3051.78	cell surface spherulin 4 family protein
AFLA_100180	875	4906	1731	1876.47	phosphoribosyl-aminoimidazole-succinocarboxamide synthase
AFLA_006610	254	6380	1732	2491.59	lipase, putative
AFLA_079900	461	5077	1734	1771.63	recombination hotspot-binding protein (Translin), putative
AFLA_070720	783	3252	1735	1712.76	A kinase anchor protein, putative
AFLA_025980	182	2941	1736	1727.04	Hsp90 co-chaperone Cdc37
AFLA_043130	542	3510	1736	1763.71	fatty acid desaturase, putative
AFLA_083240	481	6103	1737	2369.98	xylitol dehydrogenase LadA/XdhB
AFLA_133810	175	5803	1740	2225.13	conserved hypothetical protein
AFLA_093820	708	3416	1741	1848.31	ssDNA binding protein Ssb3, putative
AFLA_021180	320	10102	1741	3424.39	profilin, putative
AFLA_006420	708	3116	1741	1833.49	Cdc48-dependent protein degradation adaptor protein (Shp1), putative
AFLA_006520	800	3318	1741	1826.19	CRAL/TRIO domain protein
AFLA_103510	358	4804	1742	1945.13	IFRD domain protein
AFLA_052020	427	2695	1743	1646.81	conserved hypothetical protein
AFLA_036930	381	4381	1745	1730.39	conserved hypothetical protein
AFLA_042100	752	2588	1746	1714.55	small nuclear ribonucleoprotein (LSM7), putative
AFLA_113590	76	11141	1748	2984.93	conserved hypothetical protein
AFLA_021530	477	5897	1748	1998.78	conserved hypothetical protein
AFLA_020210	541	3846	1749	1875.3	sexual development transcription factor NsdD
AFLA_087140	354	3280	1749	1565.33	PX domain protein
AFLA_127640	941	3499	1749	1872.12	NADH-quinone oxidoreductase, 23 kDa subunit, putative
AFLA_068430	329	2828	1750	1644.37	adhesion regulating molecule, putative
AFLA_048350	1001	5530	1751	2035.52	protein kinase (Chm1), putative
AFLA_088380	453	4072	1751	1910.67	Patatin-like serine hydrolase, putative
AFLA_130480	717	3956	1751	1795.83	replication protein A 70 kDa DNA-binding subunit
AFLA_086250	1059	2818	1755	1839.65	translation repressor/antiviral protein Ski3, putative
AFLA_034490	849	12313	1756	2443.51	EH domain binding protein epsin 2
AFLA_057370	885	4248	1756	1917.83	ubiquitin conjugating enzyme (UbcA), putative
AFLA_081860	886	2817	1757	1781.75	protein kinase and ribonuclease Ire1, putative
AFLA_093890	300	6203	1757	2335.9	conserved hypothetical protein
AFLA_031280	491	6058	1757	2181.28	mitochondrial large ribosomal subunit L49, putative
AFLA_073180	188	10694	1759	2558.08	MFS monosaccharide transporter, putative
AFLA_098750	1083	5552	1761	1989.12	calcineurin catalytic subunit CnaA
AFLA_085250	681	4092	1761	1894.19	RNA binding protein, putative
AFLA_131280	976	7142	1763	2163.76	actin cortical patch assembly protein Pan1, putative
AFLA_008080	296	8881	1763	2960.13	hypothetical protein
AFLA_115370	962	3447	1763	1841.19	conserved hypothetical protein
AFLA_115310	514	2921	1764	1680.95	Golgi membrane protein, putative
AFLA_130490	446	3156	1765	1820.73	ubiquitin C-terminal hydrolase, putative
AFLA_098360	384	5766	1765	2267.22	2-nitropropane dioxygenase family oxidoreductase, putative
AFLA_136370	757	6348	1766	2420.31	alcohol dehydrogenase, putative
AFLA_117780	686	2700	1767	1739.19	farnesyl-diphosphate farnesyltransferase, putative
AFLA_030690	669	7160	1768	2445.39	conserved hypothetical protein
AFLA_017120	348	3396	1768	1665.57	UV-induced protein uvi15, putative
AFLA_067460	510	3369	1773	1791.92	37S ribosomal protein Mrp17
AFLA_068550	977	4972	1773	2015.81	Coatomer subunit beta, putative
AFLA_067570	280	5179	1776	1835.99	arrestin domain protein
AFLA_019700	922	3354	1776	1830.63	conserved hypothetical protein
AFLA_069630	591	6382	1776	2178.75	UPF0261 domain protein
AFLA_053990	557	5913	1777	2504.6	class II aldolase/adducin domain protein
AFLA_128530	471	4442	1778	2046.52	delta-1-pyrroline-5-carboxylate dehydrogenase PrnC
AFLA_048420	849	4096	1779	1872.6	serine/threonine protein kinase, putative
AFLA_022090	650	3478	1779	1806.86	conserved hypothetical protein
AFLA_106400	1008	3066	1780	1831.89	ubiquitin-like activating enzyme (UlaA), putative
AFLA_052380	889	12078	1781	2507.49	aldehyde dehydrogenase, putative
AFLA_043380	213	6461	1783	2360.99	actin cortical patch protein Sur7, putative
AFLA_037590	155	7984	1783	2006.36	conserved hypothetical protein
AFLA_133000	903	2733	1783	1789.78	pre-mRNA splicing factor (Prp8), putative
AFLA_084440	816	5762	1784	1899.88	autophagy protein Atg27, putative
AFLA_042540	246	9269	1786	2459.54	conserved hypothetical protein
AFLA_007450	554	13271	1786	4513.77	O-methyltransferase, putative
AFLA_003510	521	4544	1786	1975.04	conserved hypothetical protein
AFLA_080900	310	4473	1788	1921.9	aspartyl-tRNA synthetase, cytoplasmic
AFLA_114020	458	4831	1790	1900.45	conserved hypothetical protein
AFLA_103750	799	5186	1791	1907.28	phospholipase D1 (PLD1), putative
AFLA_042900	138	8613	1791	2928.46	conserved hypothetical protein
AFLA_080030	863	4001	1792	1815.12	topoisomerase I
AFLA_005570	24	6181	1793	2422.98	oxidoreductase, short-chain dehydrogenase/reductase family
AFLA_054120	358	4828	1793	1923.33	DUF1212 domain membrane protein
AFLA_102390	942	6632	1794	2734.31	conserved hypothetical protein
AFLA_133270	242	3888	1794	1818.65	Yippee zinc-binding protein Moh1, putative
AFLA_099240	358	6947	1795	2337.17	D-arabinitol dehydrogenase ArbD, putative
AFLA_128930	836	7341	1797	2188.13	phosphopentothenoylcysteine decarboxylase, putative
AFLA_121550	737	5998	1801	2058.93	conserved hypothetical protein
AFLA_078500	436	9756	1802	2466.57	bZIP transcription factor, putative
AFLA_088680	1017	4614	1804	1960.05	WD repeat protein
AFLA_118010	746	3009	1805	1884.3	cap binding protein
AFLA_101310	593	6631	1806	2354.54	MFS transporter, putative
AFLA_006630	300	6377	1808	2417.95	high-affinity iron transporter FtrA
AFLA_008840	570	5462	1809	1946.45	DNA topoisomerase II
AFLA_114050	466	3331	1809	1897.08	phosphoethanolamine
AFLA_020340	951	3244	1809	1926.95	sulfate transporter, putative
AFLA_129900	886	3463	1810	1877.51	siderochrome-iron transporter MirC
AFLA_047420	895	3023	1813	1801.45	hypothetical protein
AFLA_104070	1280	3548	1813	1898.12	j domain containing protein, putative
AFLA_125770	58	11670	1815	3710.82	LysR family regulatory protein, putative
AFLA_092960	941	2817	1816	1820.25	small nuclear ribonucleoprotein, putative
AFLA_066200	632	4690	1817	2001.82	C6 finger domain protein, putative
AFLA_074070	346	7536	1820	2555.13	siderochrome-iron transporter, putative
AFLA_008920	698	8168	1821	2107.05	conserved hypothetical protein
AFLA_043600	1182	3033	1821	1878.31	Golgi membrane protein (Rer1), putative
AFLA_078660	1211	3379	1822	1844.52	DUF962 domain protein
AFLA_101070	428	3301	1822	1896.01	sorting nexin Snx3, putative
AFLA_033260	756	2841	1823	1739.22	ubiquitin-protein ligase Sel1/Ubx2, putative
AFLA_096340	713	5902	1823	2398.08	hypothetical protein
AFLA_083360	258	4651	1824	1974.35	extracellular cell wall glucanase Crf1/allergen Asp F9
AFLA_103950	960	4450	1824	1995.46	DEAD-box RNA helicase Dhh1/Vad1, putative
AFLA_036090	557	10382	1824	3295.55	homogentisate 1,2-dioxygenase (HmgA), putative
AFLA_134730	742	3065	1825	1815.76	transcriptional corepressor Cyc8, putative
AFLA_081040	1151	2501	1826	1798.8	AAA family ATPase Rvb2/Reptin, putative
AFLA_003630	755	7597	1828	2531.31	C2H2 finger domain protein, putative
AFLA_051240	1032	6360	1828	2243.82	MAP kinase kinase (Mkk2), putative
AFLA_119500	457	3407	1831	1797.93	20S proteasome maturation protein Ump1, putative
AFLA_006660	786	3411	1832	1847.29	alkaline phosphatase family protein
AFLA_108430	41	11625	1833	3729.05	conserved hypothetical protein
AFLA_108770	90	7226	1833	2187.86	amino acid permease, putative
AFLA_006170	80	10606	1834	3229.31	polyketide synthetase PksP
AFLA_105200	417	5770	1836	2105.47	GPI anchored endo-1,3(4)-beta-glucanase, putative
AFLA_062850	617	7148	1836	2106.47	fatty acid desaturase, putative
AFLA_137860	515	10638	1837	2862.46	conserved hypothetical protein
AFLA_066250	349	7912	1839	2079.29	conserved hypothetical protein
AFLA_019610	80	13009	1841	4244.82	carboxypeptidase S1, putative
AFLA_020100	809	10276	1845	2679.43	conserved hypothetical protein
AFLA_131270	638	6154	1846	2176.96	DNA-directed RNA polymerase II subunit RPB11a, putative
AFLA_115480	787	3598	1846	1871.61	inositol kinase kinase (UvsB), putative
AFLA_107440	1252	7200	1848	2182.35	cytoskeleton assembly control protein Sla1, putative
AFLA_026710	456	5018	1848	1873.51	iron-sulfur cluster assembly accessory protein Isa1, putative
AFLA_100010	972	6251	1852	2171.39	t-complex protein 1, delta subunit, putative
AFLA_048720	481	4524	1852	1983.16	5-aminolevulinic acid synthase HemA
AFLA_087370	1001	3352	1853	1877.07	transcription/RNA-processing factor Ssu72
AFLA_028660	892	2884	1854	1856.54	mitochondrial translation initiation factor IF-2, putative
AFLA_105960	1108	3027	1856	1865.86	autophagy protein Atg20, putative
AFLA_014240	57	10881	1859	3205.58	conserved hypothetical protein
AFLA_073980	715	6212	1859	2157.69	cyclin-dependent protein kinase complex component, putative
AFLA_019870	506	3158	1860	1832.07	phosphatidylserine decarboxylase Psd2, putative
AFLA_022110	985	3100	1860	1853.82	export control protein CHS7-like, putative
AFLA_025220	487	12059	1861	3084.12	UPF0047 domain protein
AFLA_076490	1045	4115	1863	1956.48	RSC complex subunit (RSC8), putative
AFLA_132380	1024	3364	1863	1955.73	RAS small monomeric GTPase RasA
AFLA_054140	70	7595	1864	2831.89	conserved hypothetical protein
AFLA_054340	538	12266	1864	2373.14	isoflavone reductase family protein
AFLA_079000	1009	3597	1866	1903.51	conserved hypothetical protein
AFLA_094310	757	5611	1867	2106.48	conserved hypothetical protein
AFLA_093120	1107	4927	1867	1976.73	conserved hypothetical protein
AFLA_091680	1118	3245	1868	1871.49	conserved hypothetical protein
AFLA_037650	1093	3222	1868	1862.24	endoplasmic reticulum DnaJ domain protein Erj5, putative
AFLA_055480	1197	13155	1869	2700.34	calcineurin Ca2+-binding regulatory subunit CnaB
AFLA_005690	263	5066	1870	1918.24	LCCL domain protein
AFLA_015510	690	3200	1872	1855.2	small nuclear ribonucleoprotein SmF, putative
AFLA_119770	465	6020	1873	2043.61	conserved hypothetical protein
AFLA_086670	546	3629	1881	1915.67	cystathionine beta-synthase (beta-thionase), putative
AFLA_083490	79	11604	1881	3465.39	sterol delta 5,6-desaturase, putative
AFLA_056670	593	6011	1882	2203.36	4-aminobutyrate transaminase GatA
AFLA_031830	376	6451	1882	2075.41	ferric-chelate reductase, putative
AFLA_028750	564	7131	1883	2436.45	UMTA methyltransferase family protein
AFLA_089560	117	6747	1883	2409.48	pyruvate decarboxylase, putative
AFLA_082810	1012	3564	1887	2009.92	conserved hypothetical protein
AFLA_016400	447	5948	1887	2312.04	glutathione S-transferase, putative
AFLA_031340	571	6238	1887	2204.2	bZIP transcription factor (AtfA), putative
AFLA_007230	862	4391	1889	1954.16	er lumen protein retaining receptor, putative
AFLA_032610	1033	3699	1891	1908.13	Ccr4-Not transcription complex subunit (NOT1), putative
AFLA_128910	1276	3240	1891	1962.23	VHS domain protein
AFLA_114870	382	12973	1891	3487.72	conserved hypothetical protein
AFLA_102190	546	7600	1891	2648.53	conserved hypothetical protein
AFLA_031950	1105	2678	1893	1895	RAB GTPase Vps21/Ypt51, putative
AFLA_135360	939	4528	1895	1911.96	hydroxymethylglutaryl-CoA lyase
AFLA_110500	517	3549	1895	1792.05	phosphatidic acid phosphatase, putative
AFLA_082890	341	4275	1896	1820.92	ribonuclease T2, putative
AFLA_117620	104	12466	1897	3806.55	conserved hypothetical protein
AFLA_094260	1306	13274	1897	3419.37	IBR finger domain protein
AFLA_027250	751	7198	1899	2540.95	aldo-keto reductase, putative
AFLA_137980	762	10028	1900	2398.51	NADH-cytochrome b5 reductase
AFLA_064950	146	5685	1901	2189.96	conserved hypothetical protein
AFLA_061240	633	12671	1902	2769.92	conserved hypothetical protein
AFLA_053980	272	7550	1903	2914.87	DUF636 domain protein
AFLA_007080	917	3338	1903	1873.86	conserved hypothetical protein
AFLA_103760	625	3536	1907	1979.7	conserved hypothetical protein
AFLA_075200	233	10566	1907	2734.72	conserved hypothetical protein
AFLA_068600	126	11436	1908	3749.35	ammonium transporter MepA
AFLA_024480	606	6468	1911	2204.81	6-phosphofructokinase alpha subunit
AFLA_131290	587	3070	1912	1843.76	sodium/calcium exchanger protein
AFLA_050410	678	4871	1913	1952.12	myosin heavy chain, clone, putative
AFLA_015170	576	4562	1913	1980.37	SNARE complex subunit (Syn8), putative
AFLA_046650	868	8680	1913	2388.78	orotidine 5'-phosphate decarboxylase PyrG
AFLA_048790	907	5759	1914	2337.41	BAR domain protein
AFLA_112430	830	3391	1916	2050.52	sensor histidine kinase/response regulator, putative
AFLA_062160	327	2884	1917	1822.08	polyubiquitin binding protein (Doa1/Ufd3), putative
AFLA_087880	175	4115	1919	1862.66	integral membrane protein
AFLA_137060	771	3678	1921	1980.73	plasma membrane SNARE protein (Sec9), putative
AFLA_052100	1270	6591	1922	2328.99	HAD superfamily hydrolase, putative
AFLA_091890	653	3095	1928	1888.11	Rho guanyl nucleotide exchange factor (Rom2), putative
AFLA_031290	982	4634	1928	1939.77	eukaryotic translation initiation factor 3 subunit EifCe, putative
AFLA_102850	716	3383	1930	1873.69	Rho GTPase activator (Rgd1), putative
AFLA_032100	616	3073	1931	1831.06	clathrin-coated vesicle protein, putative
AFLA_110230	142	6735	1932	2261.07	conserved hypothetical protein
AFLA_014850	773	3534	1932	1977.36	phosphatidylethanolamine methyltransferase Pem1, putative
AFLA_113780	1086	5079	1933	2120.66	casein kinase II beta subunit CKB1
AFLA_014690	1117	3643	1936	2034.35	translocon-associated protein, alpha subunit, putative
AFLA_050110	869	10553	1937	2611.93	conserved hypothetical protein
AFLA_115050	614	7305	1938	2916.45	IBR domain protein
AFLA_122700	1132	3441	1939	2073.45	UPD-GlcNAc transporter (Mnn2-2), putative
AFLA_083660	874	7559	1940	2375.37	phosphatidylserine decarboxylase, putative
AFLA_127110	475	5322	1940	2366.93	MFS transporter, putative
AFLA_091670	428	11139	1941	2862.43	metalloreductase, putative
AFLA_087260	627	5612	1941	2151.11	conserved hypothetical protein
AFLA_020150	719	3694	1944	2075.12	glutamate-cysteine ligase Gcs1, putative
AFLA_016870	1252	4680	1946	2111.82	C-3 sterol dehydrogenase/C-4 decarboxylase
AFLA_103680	1084	4576	1948	2178.1	Sec7 domain protein
AFLA_094690	899	2652	1948	1853.94	cell cycle control protein (Cwf8), putative
AFLA_047460	848	13348	1949	2958.9	COP9 subunit 3, putative
AFLA_092060	1251	7430	1951	2376.42	Golgi to endosome transport protein (Ent3), putative
AFLA_024090	722	13175	1952	3021.41	efflux pump antibiotic resistance protein, putative
AFLA_078640	954	5499	1952	2244.34	methylenetetrahydrofolate dehydrogenase
AFLA_112540	610	12492	1952	2938.6	conserved hypothetical protein
AFLA_076080	1034	6586	1952	2373.65	conserved hypothetical protein
AFLA_033430	90	9450	1954	2459.78	oxidoreductase, short-chain dehydrogenase/reductase family
AFLA_005960	591	3690	1955	2022.95	pyruvate dehydrogenase kinase, putative
AFLA_027520	1229	3196	1955	2017.36	intermembrane space AAA protease IAP-1
AFLA_107590	436	7403	1956	2643.41	3-methyl-2-oxobutanoate dehydrogenase, putative
AFLA_048890	674	4866	1956	2213.14	50S ribosomal subunit L7, putative
AFLA_004550	936	3051	1956	2011.57	vacuolar dynamin-like GTPase VpsA, putative
AFLA_100140	1166	4328	1957	2239.78	metallo-beta-lactamase superfamily protein
AFLA_103960	796	3368	1958	1950.54	mitochondrial tricarboxylate transporter (Ctp), putative
AFLA_102010	128	10273	1959	3456.84	class V chitinase, putative
AFLA_043100	480	4577	1960	2133.51	GrpB domain protein
AFLA_109030	1086	3610	1963	2029.25	C6 transcription factor, putative
AFLA_028360	318	4130	1964	1935.48	conserved hypothetical protein
AFLA_103100	826	3329	1965	2028.16	iron-sulfur cluster biosynthesis protein Isd11, putative
AFLA_135670	1228	3332	1965	1984.63	translocation protein Sec62, putative
AFLA_088750	658	3683	1965	1928.29	meiotic recombination protein Ski8/Rec14, putative
AFLA_097240	1066	4406	1965	2132.4	conserved hypothetical protein
AFLA_107460	826	10673	1965	2464.42	mannosyltransferase PMTI
AFLA_132460	903	4467	1965	2149.34	COPI-coated vesicle protein, putative
AFLA_084720	121	5674	1966	2431.96	C6 transcription factor, putative
AFLA_025920	697	5727	1966	2192.67	mitochondrial distribution and morphology protein, putative
AFLA_045600	251	9047	1966	2706.48	cyclohexanone monooxygenase, putative
AFLA_020470	1208	4115	1968	2039.3	ribose-phosphate pyrophosphokinase
AFLA_130260	967	2961	1970	1924.24	chromatin remodeling and histone acetyltransferase complexes subunit
AFLA_078620	1180	2963	1973	2047.04	DUF850 domain protein
AFLA_062250	1098	3230	1973	1976.46	carbon catabolite derepressing protein kinase Snf1, putative
AFLA_035010	1210	6646	1974	2385.18	small nuclear ribonucleoprotein SmD1, putative
AFLA_022670	639	3307	1974	1955.67	transcription elongation complex subunit (Cdc68)
AFLA_030860	974	6970	1975	2429.23	RNAPII degradation factor Def1, putative
AFLA_136310	791	3680	1975	1893.54	mitochondrial membrane fission protein (Fis1), putative
AFLA_050620	1016	4058	1976	2118.72	peroxisome biosynthesis protein (Peroxin-2), putative
AFLA_080460	843	3265	1977	1912.11	dolichol phosphate-mannose biosynthesis regulatory protein Dpm2
AFLA_108880	1077	6148	1979	2371.25	mitochondrial import receptor subunit (Tom20), putative
AFLA_026230	845	3956	1980	2041.24	conserved hypothetical protein
AFLA_027340	609	5080	1981	2273.8	Aha1 domain family
AFLA_131430	797	10323	1982	2553.3	hypothetical protein
AFLA_061630	974	3803	1983	1994.06	ssDNA binding protein, putative
AFLA_048560	1044	3602	1983	2016.49	integral membrane protein (Ytp1), putative
AFLA_052670	810	11689	1984	3078.12	RNA recognition motif (rrm) domain containing protein, putative
AFLA_021590	904	4538	1985	2128.92	vacuolar transporter chaperon Vtc1, putative
AFLA_020380	87	4638	1985	2011.98	stomatin family protein
AFLA_122740	740	5946	1986	1947.46	AMP deaminase Amd1, putative
AFLA_004410	7	10744	1987	3723.46	conserved hypothetical protein
AFLA_044340	563	3930	1989	2028.77	conserved hypothetical protein
AFLA_018310	802	5553	1990	2308.83	geranylgeranyl diphosphate synthase
AFLA_045330	774	13432	1995	2934.13	eukaryotic translation initiation factor subunit eIF-4F, putative
AFLA_050010	671	12452	1995	2557.94	8-amino-7-oxononanoate synthase, putative
AFLA_028980	233	10850	1996	2527.54	plasma membrane phosphate transporter Pho87, putative
AFLA_035860	1271	3487	1997	2037.37	DUF21 and CBS domain protein (Mam3), putative
AFLA_093960	1132	4643	1998	2256.02	mitochondrial 3-hydroxyisobutyryl-CoA hydrolase, putative
AFLA_133880	1172	2737	1998	1988.1	ADP-ribosylation factor, putative
AFLA_055550	3	5777	1998	2203.45	conserved hypothetical protein
AFLA_093220	1142	3882	1998	2082.59	Ran-specific GTPase-activating protein 1, putative
AFLA_054350	1388	4776	1998	2161.69	actin-binding protein Fragmin, putative
AFLA_052760	935	3488	2000	1976.75	class I alpha-mannosidase 1A
AFLA_033760	841	4057	2001	2127.3	ubiquitin conjugating enzyme (UbcK), putative
AFLA_096220	38	10959	2002	3389.64	HHE domain protein
AFLA_110920	830	4343	2002	2140.39	conserved hypothetical protein
AFLA_006650	424	4926	2002	2102.25	class III chitinase, putative
AFLA_067440	655	3561	2003	2060.04	RING finger ubiquitin ligase (Tul1), putative
AFLA_121070	445	4723	2003	1959.11	glycosyl hydrolase, putative
AFLA_119490	870	3849	2003	2051.8	37S ribosomal protein S12
AFLA_133620	39	6822	2003	2698.52	conserved hypothetical protein
AFLA_115040	739	3738	2004	2007.84	3-hydroxybutyryl-CoA dehydrogenase, putative
AFLA_016120	66	11270	2006	3713.57	O-methyltransferase family protein
AFLA_073430	978	7312	2006	2431.93	integral peroxisomal membrane protein
AFLA_093110	766	5413	2009	2220.48	conserved hypothetical protein
AFLA_077020	580	2877	2010	1955.33	DNA damage-inducible v-SNARE binding protein Ddi1, putative
AFLA_023330	425	11984	2010	3037.07	conserved hypothetical protein
AFLA_064830	271	7279	2014	2434.36	transmembrane protein 14, putative
AFLA_093760	1199	3199	2014	2092.1	conserved hypothetical protein
AFLA_017990	520	4731	2016	1992.54	conserved hypothetical protein
AFLA_103980	825	3002	2016	2019.49	DnaJ and TPR domain protein
AFLA_137750	754	3524	2017	2104.13	conserved hypothetical protein
AFLA_130090	937	3950	2018	2132.59	conserved hypothetical protein
AFLA_112740	608	4006	2019	1858.2	SNARE domain protein
AFLA_083430	467	3875	2020	2063.13	choline kinase, putative
AFLA_102340	634	7505	2021	2497.51	oligo-1,6-glucosidase
AFLA_031220	1144	3389	2022	2100.69	RNA Polymerase II CTD phosphatase Fcp1, putative
AFLA_006560	805	11996	2022	2666.65	conserved hypothetical protein
AFLA_030660	673	8922	2022	3667.13	oxidoreductase, zinc-binding
AFLA_031990	1072	3814	2024	2112.59	Arp2/3 complex subunit Arc16, putative
AFLA_006540	949	5070	2024	2248.02	conserved hypothetical protein
AFLA_068320	55	12605	2025	3687.84	conserved hypothetical protein
AFLA_006620	303	10083	2025	3701.76	ferrooxidoreductase Fet3, putative
AFLA_133360	554	3807	2025	2057.22	mitochondrial DnaJ chaperone (Tim14), putative
AFLA_100030	571	4843	2028	2196.4	nucleolin protein Nsr1, putative
AFLA_137450	338	6073	2030	2240.64	protein phosphatase regulatory subunit Gac1, putative
AFLA_084760	1439	4990	2031	2236.75	endosomal SPRY domain protein, putative
AFLA_088480	1080	4950	2032	2323.48	SNF7 family protein
AFLA_059820	513	8297	2034	2721.71	conserved hypothetical protein
AFLA_046890	820	3872	2034	2118.14	phospholipid metabolism enzyme regulator, putative
AFLA_048520	395	5080	2036	1959.2	alpha 1,2-mannosyltransferase Smp3, putative
AFLA_091690	899	12023	2036	2789.71	isocitrate lyase
AFLA_060030	613	7456	2037	2627.9	hypothetical protein
AFLA_073110	110	11805	2038	3270.96	hypothetical protein
AFLA_093790	171	7210	2038	2802.88	dihydroxyacetone kinase (DakA), putative
AFLA_130220	1270	4726	2038	2208.46	conserved hypothetical protein
AFLA_080470	352	3630	2041	2034.55	conserved hypothetical protein
AFLA_016560	856	5236	2041	2229.73	methionyl-tRNA synthetase
AFLA_066110	520	8867	2043	2731.86	bicyclomycin resistance protein, putative
AFLA_085450	861	8356	2044	2524.88	eukaryotic translation initiation factor 3 subunit EifCk, putative
AFLA_106320	1267	4661	2045	2221.9	cleavage and polyadenylylation specificity factor subunit Fip1
AFLA_104000	1382	5562	2046	2225.02	hypothetical protein
AFLA_088070	932	4458	2047	2175.16	ABC transporter (Adp1), putative
AFLA_007760	196	6409	2047	2105.84	flavin-binding monooxygenase-like protein
AFLA_026820	1341	3458	2052	2090.94	phosphoribosyl diphosphate synthase isoform 4
AFLA_022060	1361	3239	2052	2083.33	cyclin-dependent protein kinase regulator Pho80
AFLA_028970	1120	4476	2052	2202.1	30S ribosomal protein S7, putative
AFLA_078390	1045	3287	2053	2056.43	transcription factor (Sin3), putative
AFLA_093440	989	3061	2057	2014.02	integral membrane protein (Ptm1), putative
AFLA_067690	734	3825	2057	2185.58	50S ribosomal subunit protein L15
AFLA_103710	1111	4277	2058	2263.81	28 kDa heat- and acid-stable phosphoprotein, putative
AFLA_100810	372	7593	2059	2444.29	conserved hypothetical protein
AFLA_097380	197	4583	2059	2369.96	CP2 transcription factor, putative
AFLA_103330	443	3422	2059	2005.66	glutaryl-CoA dehydrogenase, putative
AFLA_035540	1217	6893	2059	2554.05	signal transducing adapter molecule, putative
AFLA_026150	314	9703	2059	2715.48	alpha-glucosidase AgdA, putative
AFLA_004630	876	4677	2060	2269.64	farnesyl-pyrophosphate synthetase
AFLA_085830	275	4334	2060	2249.24	conserved hypothetical protein
AFLA_041260	398	5526	2060	2253.29	ribosome associated DnaJ chaperone Zuotin, putative
AFLA_027040	1123	12440	2061	2759.41	nucleoporin SONB, putative
AFLA_045240	1049	10907	2065	2783.04	serine/threonine protein kinase
AFLA_027200	139	5402	2066	2285.89	xanthine dehydrogenase HxA, putative
AFLA_130390	913	3358	2067	2045.27	glutamine amidotransferase:cyclase
AFLA_139020	109	3850	2070	2018.04	conserved hypothetical protein
AFLA_134450	965	4859	2072	2208.41	galactose-1-phosphate uridylyltransferase
AFLA_080200	146	12497	2072	3490.52	glycosyl hydrolase, putative
AFLA_012450	1261	3294	2073	2079.12	None
AFLA_003740	1039	4793	2074	2311.3	conserved hypothetical protein
AFLA_071300	535	4647	2077	2249.14	conserved hypothetical protein
AFLA_003760	15	7734	2077	3178.82	NACHT domain protein
AFLA_020890	1085	4107	2079	2169.8	clathrin-coated vesiclec protein (Bud7), putative
AFLA_028790	618	4719	2080	2167.3	GARP complex subunit (Sac2), putative
AFLA_052430	955	4073	2081	2276.86	alpha,alpha-trehalase TreB/Nth1
AFLA_123890	126	7085	2081	2740.06	conserved hypothetical protein
AFLA_103900	1392	3024	2082	2102.66	cystathionine gamma-synthase, putative
AFLA_068080	14	7681	2082	2752.83	cytosolic Cu/Zn superoxide dismutase, putative
AFLA_048290	845	4956	2084	2326.11	homoserine kinase
AFLA_070700	1238	4253	2084	2249.59	conserved hypothetical protein
AFLA_121440	640	6929	2087	2272.93	fumarylacetoacetate hydrolase, putative
AFLA_083380	793	4265	2087	2122.04	MAP kinase kinase (Pbs2), putative
AFLA_102090	1036	6495	2087	2406.51	phosphopantothenate-cysteine ligase, putative
AFLA_112060	827	5321	2088	2204.59	amino acid transporter, putative
AFLA_044070	558	6117	2088	2240.89	conserved hypothetical protein
AFLA_041180	173	13385	2088	3760.92	conserved hypothetical protein
AFLA_105470	352	6004	2089	2243.05	translation initiation factor eIF-2B subunit family protein
AFLA_079640	533	3514	2089	1976.4	sensor histidine kinase/response regulator, putative
AFLA_034200	205	7613	2092	2561.71	2-heptaprenyl-1,4-naphthoquinone methyltransferase, putative
AFLA_038790	447	9106	2092	2365.14	adenosine deaminase family protein
AFLA_114600	899	12538	2094	3578.8	hypothetical protein
AFLA_040140	303	12501	2095	2958.52	aquaporin
AFLA_077480	1	11578	2096	3994.92	conserved hypothetical protein
AFLA_073350	1063	3792	2097	2116.35	protein kinase C substrate, putative
AFLA_052540	1045	5329	2099	2205.02	conserved hypothetical protein
AFLA_056120	441	7474	2099	2249.08	GTPase activating protein (Gyp7), putative
AFLA_030110	1038	4160	2100	2162.46	COPII-coated vesicle membrane protein Erv46, putative
AFLA_105380	989	5212	2101	2385.02	actin-binding protein, putative
AFLA_101120	979	6805	2107	2525.89	WD repeat protein
AFLA_051650	1235	5728	2107	2397.43	Phosphoserine phosphatase, putative
AFLA_135030	890	4003	2108	2148.71	mitochondrial intermembrane space translocase subunit Tim13, putative
AFLA_115390	725	3843	2110	2129.19	cytochrome c oxidase-assembly factor cox16, mitochondrial precursor
AFLA_041950	262	8859	2111	3100.04	exo-beta-1,3-glucanase Exg0
AFLA_088010	693	7472	2112	2663.65	kynurenine 3-monooxygenase, putative
AFLA_094010	274	6639	2112	2351.6	bZIP transcription factor (Atf21), putative
AFLA_039400	278	11773	2113	3869.04	extracellular guanyl-specific ribonuclease RntA
AFLA_053160	35	9740	2113	2790.7	conserved hypothetical protein
AFLA_032080	974	3435	2113	2163.84	transcription initiation protein
AFLA_089230	647	3654	2114	2155.16	mitochondrial enoyl reductase, putative
AFLA_014260	22	8653	2116	3035.93	conidial hydrophobin RodB/HypB
AFLA_037350	744	8267	2117	2558.28	casein kinase I, putative
AFLA_003920	591	3942	2118	2106.3	cysteine synthase (o-acetylserine (thiol)-lyase) (csase)
AFLA_028690	1334	3371	2118	2119.46	Yip1 domain family
AFLA_137950	518	4432	2121	2273.14	GMP synthase
AFLA_114460	838	5885	2122	2475.93	conserved hypothetical protein
AFLA_073170	857	3444	2123	2094.06	manganese ion homeostasis (Fr), putative
AFLA_119630	1151	4593	2123	2405.4	SH3 domain protein
AFLA_131370	480	5689	2125	2386.4	alpha,alpha-trehalose phosphate synthase subunit TPS3, putative
AFLA_078800	685	4483	2126	2260.19	peroxisomal membrane protein (Pex13), putative
AFLA_027820	487	4228	2127	2067.49	conserved hypothetical protein
AFLA_087250	602	3837	2127	2075.37	phosphoinositide-specific phospholipase C, putative
AFLA_124980	97	11466	2129	3870.59	4-carboxymuconolactone decarboxylase, putative
AFLA_071480	729	3759	2131	2247.54	conserved hypothetical protein
AFLA_048330	1383	6154	2132	2554.96	acyltransferase, putative
AFLA_127910	819	4977	2132	2301.96	alpha-1,2-mannosyltransferase (Alg11), putative
AFLA_093590	206	8433	2134	2442.55	arrestin (or S-antigen), N-terminal domain protein
AFLA_092390	908	5925	2136	2418.34	polarized growth protein (Boi2), putative
AFLA_041970	84	7208	2137	3219.6	chitin binding protein, putative
AFLA_030880	602	4588	2137	2241.53	conserved hypothetical protein
AFLA_086210	407	10323	2139	3147.41	epoxide hydrolase, putative
AFLA_025910	756	5828	2140	2426.77	conserved hypothetical protein
AFLA_006990	1066	4933	2140	2366.99	DNA directed RNA polymerase III subunit Rpc82, putative
AFLA_103490	1007	3770	2144	2116.92	transcription elongation factor SPT6, putative
AFLA_099460	605	10267	2144	2624.27	transcription factor RfeG, putative
AFLA_065450	46	11692	2145	4381.75	penicillolysin/deuterolysin metalloprotease, putative
AFLA_032460	267	6153	2146	2445.9	pterin-4-alpha-carbinolamine dehydratase, putative
AFLA_133980	486	5153	2146	2165.75	50S ribosomal protein L4
AFLA_128000	799	5138	2147	2367.36	protoporphyrinogen oxidase, putative
AFLA_139340	262	8645	2147	3107.55	aflS/ pathway regulator
AFLA_102400	274	6592	2148	2359.18	siderophore biosynthesis enzyme, putative
AFLA_017390	973	4316	2150	2290.77	diphthine synthase, putative
AFLA_100190	959	5697	2150	2503.75	phosphoribosyl-aminoimidazole-succinocarboxamide synthase
AFLA_099890	190	5740	2151	2190.93	nuclear protein Qri2/Nse4, putative
AFLA_029170	615	4968	2152	2445.63	C-8 sterol isomerase (Erg-1), putative
AFLA_028380	1420	6571	2152	2485.25	conserved hypothetical protein
AFLA_088520	1384	3167	2152	2117.92	CUE domain protein, putative
AFLA_026790	299	4167	2153	2127.14	fatty acid oxygenase PpoA, putative
AFLA_037890	978	4642	2153	2290.54	conserved hypothetical protein
AFLA_009240	649	12631	2156	3646.86	serine protein kinase, putative
AFLA_103060	1297	3226	2156	2151.37	DHHC zinc finger membrane protein, putative
AFLA_079050	1109	5086	2157	2320.94	MFS transporter, putative
AFLA_110480	79	5121	2158	2280.35	molybdenum cofactor sulfurase protein (HxB), putative
AFLA_054870	1210	3638	2158	2197.69	6-phosphofructo-2-kinase, putative
AFLA_037370	538	4873	2159	2359.42	regulator of G protein signaling domain protein RgsD
AFLA_078820	267	7594	2159	2607.83	conserved hypothetical protein
AFLA_133150	478	8118	2161	2350.53	catechol dioxygenase, putative
AFLA_117760	545	8059	2161	2764.9	phytase, putative
AFLA_047320	1010	2918	2161	1996.99	conserved hypothetical protein
AFLA_028090	739	7403	2161	3002.67	biotin-dependent 2-oxo acid dehydrogenases acyltransferase, putative
AFLA_062490	825	5654	2162	2241.51	AP-1 adaptor complex subunit sigma, putative
AFLA_022620	973	5430	2162	2437.24	ctl transporter, putative
AFLA_126390	367	6291	2162	2527.08	oxidoreductase 2-nitropropane dioxygenase family, putative
AFLA_028910	653	6287	2163	2223.45	polyadenylate-binding protein
AFLA_022130	1392	4628	2163	2319.43	RING finger domain protein (Rnf10), putative
AFLA_027230	1034	6367	2164	2405.11	alpha-aminoadipate reductase Lys2, putative
AFLA_004590	1186	5185	2164	2288.51	catabolite degradation protein, putative
AFLA_056740	1174	3446	2164	2227.66	GTP binding protein (Gtp1), putative
AFLA_031560	807	3997	2165	2328.43	MAP kinase kinase kinase (Bck1), putative
AFLA_043740	1146	3832	2166	2204.05	Yip1 domain protein
AFLA_103220	1036	4024	2166	2124.81	cytoskeleton assembly control protein Sla2, putative
AFLA_062370	699	6348	2167	2591.8	mitochondrial outer membrane translocase receptor (TOM70), putative
AFLA_110370	134	11168	2169	2641.94	S-adenosyl-methionine-sterol-C- methyltransferase putative
AFLA_098320	1074	3631	2174	2253.61	conserved fungal protein
AFLA_015340	127	9458	2174	3035.84	conserved hypothetical protein
AFLA_133380	1103	3729	2174	2374.89	fungal specific transcription factor, putative
AFLA_007460	1037	12495	2174	3481.13	cytochrome P450, putative
AFLA_088980	1418	3719	2175	2243.96	snoRNA binding protein, putative
AFLA_029540	569	6205	2178	2528.71	peroxisomal ABC transporter (PXA1), putative
AFLA_061890	545	4836	2179	2160.42	conserved hypothetical protein
AFLA_027670	1031	4949	2179	2117.06	RNA polymerase II transcription factor subunit 1
AFLA_016960	1132	3999	2179	2255.04	acetylglutamate kinase, putative
AFLA_027910	1092	4482	2181	2269.7	serine/threonine protein kinase, putative
AFLA_086920	585	4726	2182	2308.99	Ctr copper transporter family protein
AFLA_024070	731	7771	2184	2846	cytochrome P450, putative
AFLA_091400	883	6488	2186	2331.58	2-dehydropantoate 2-reductase, putative
AFLA_015500	369	5085	2187	2143.9	DUF866 domain protein
AFLA_012120	1213	6122	2188	2337.53	LMBR1 domain protein, putative
AFLA_102150	394	7896	2190	2751.64	SAM dependent methyltransferase, putative
AFLA_035150	953	4618	2190	2258.81	proline iminopeptidase
AFLA_055800	599	4198	2191	2145.57	chromosome segregation protein Cse1, putative
AFLA_024880	1423	3828	2193	2292.58	conserved hypothetical protein
AFLA_136320	1209	6408	2199	2484.72	RING finger domain protein, putative
AFLA_043690	892	4070	2200	2286.42	phosphoribosylglycinamide formyltransferase, putative
AFLA_114010	788	5566	2200	2272.05	conserved hypothetical protein
AFLA_107470	933	5000	2200	2630.17	conserved hypothetical protein
AFLA_057770	403	13137	2202	3519.43	pectate lyase A
AFLA_054690	1010	4759	2202	2229.16	nucleolus protein required for cell viability, putative
AFLA_098260	1467	3847	2203	2303.82	AP-1 adaptor complex subunit mu, putative
AFLA_133350	1082	5266	2205	2373.53	60S ribosomal protein L24b
AFLA_075850	464	8043	2205	2978.05	conserved hypothetical protein
AFLA_084540	1642	4171	2206	2333.36	conserved hypothetical protein
AFLA_052460	736	6068	2206	2563.75	PE repeat family protein
AFLA_111530	411	6276	2207	2526.71	zinc-containing alcohol dehydrogenase, putative
AFLA_057430	1027	6279	2207	2912.65	conserved hypothetical protein
AFLA_079660	505	5772	2209	2410.88	conserved hypothetical protein
AFLA_077030	244	6905	2212	2495.48	siderochrome-iron transporter Sit1, putative
AFLA_036620	1024	5323	2212	2519.1	conserved hypothetical protein
AFLA_027090	1417	3516	2214	2226.43	conserved hypothetical protein
AFLA_062080	426	4066	2214	2302.36	NUDIX family hydrolase, putative
AFLA_070800	515	5316	2216	2231.83	conserved hypothetical protein
AFLA_027170	1268	3147	2216	2182.67	kynurenine aminotransferase, putative
AFLA_064810	373	8612	2217	2621.33	extracellular proline-serine rich protein
AFLA_041230	690	6620	2218	2474.9	sterol 24-c-methyltransferase, putative
AFLA_034470	1075	3673	2218	2207.66	anthranilate synthase component I, putative
AFLA_003670	608	3118	2219	2119.69	DEAD/DEAH box helicase, putative
AFLA_025760	939	5499	2219	2406.31	50S ribosomal protein L12
AFLA_071190	803	3760	2219	2221.81	vacuolar ATP synthase subunit G, putative
AFLA_119470	1524	3742	2220	2247.69	topoisomerase II associated protein (Pat1), putative
AFLA_106250	523	4872	2221	2217.24	HAD superfamily hydrolase, putative
AFLA_114440	1058	7879	2223	2643	L-PSP endoribonuclease family protein Brt1, putative
AFLA_052320	709	6284	2224	2225.83	aspartic endopeptidase (AP1), putative
AFLA_022360	1324	4827	2226	2395.07	SNARE complex subunit (Bet1), putative
AFLA_025620	1270	4935	2226	2327.7	secretory component protein shr3, putative
AFLA_130130	297	5773	2230	2471.1	conserved hypothetical protein
AFLA_044430	647	5121	2231	2282.71	conserved hypothetical protein
AFLA_093770	721	3054	2231	2130.19	ubiquitin ligase subunit CulD, putative
AFLA_056220	478	6115	2231	2192.98	signal sequence receptor alpha subunit, putative
AFLA_135620	792	6894	2232	2892.94	hypothetical protein
AFLA_035090	938	4310	2232	2362.07	acylphosphatase, putative
AFLA_049430	167	7606	2233	2982	conserved hypothetical protein
AFLA_051090	1494	4231	2233	2314.52	vacuolar sorting receptor (Mrl1), putative
AFLA_093940	948	6455	2234	2765.1	mitochondrial large ribosomal subunit YmL35, putative
AFLA_119270	198	3648	2234	2011.46	DUF221 domain protein, putative
AFLA_135830	927	9889	2236	2774.36	PtaB protein, putative
AFLA_068960	1486	4134	2239	2337.88	Vacuolar ATP synthase subunit H, putative
AFLA_011600	1094	4692	2239	2277.48	oligosaccharyl transferase subunit (Stt3), putative
AFLA_035780	638	4699	2240	2328.72	conserved hypothetical protein
AFLA_090400	911	6610	2241	2695.11	short-chain dehydrogenase/reductase, putative
AFLA_086840	1291	12113	2241	2860.2	cohesin complex subunit (Psm1), putative
AFLA_091000	253	10543	2241	3056.77	cytochrome P450 monooxygenase, putative
AFLA_049760	524	5513	2244	2633.49	C2H2 finger domain protein, putative
AFLA_058910	1298	5911	2245	2369.73	conserved hypothetical protein
AFLA_050830	821	4034	2245	2248.64	uridine nucleosidase Urh1, putative
AFLA_050050	1351	13063	2245	3196.16	AP-1 adaptor complex subunit gamma, putative
AFLA_086880	1310	4687	2247	2275.14	conserved hypothetical protein
AFLA_134580	1155	5577	2248	2467.72	CobW domain protein
AFLA_031150	815	4942	2249	2533.75	methylglutaconyl-CoA hydratase, mitochondrial precursor, putative
AFLA_046620	229	4709	2250	2093.92	glutathione S-transferase, putative
AFLA_029140	861	4609	2250	2460.45	siderophore biosynthesis protein, putative
AFLA_057620	1137	5554	2251	2459.02	CCR4-NOT core complex subunit Caf1, putative
AFLA_075450	634	13269	2252	3314.73	UMTA methyltransferase family protein
AFLA_053440	109	12475	2253	4273.48	conserved hypothetical protein
AFLA_032160	408	5067	2255	2488.11	3-oxoacyl-(acyl-carrier-protein) reductase, putative
[truncated: 11,484 more rows]

## Sheet: Table S2
Table S2. The two nucleotide sequences confirmed to have promoter activities in this study.
Promoter name	Gene	Length (bp)	Sequence
P4	AFLA_113120	1024	agaactacgcggtggtagatagtaagaaattctatgttgtatgcaatatatagatccgcaaggaggatattatatactactctgtaggtactcttatggtattatcttggtttttattacggagtatgattattatcatttcggctacaggagtattgtaccgacgggatccaggtacacagcggaggagtgggacacactgacaatgttttggtctgaatggtcaatggcgatggggaaggaagaatccgagggcgaatcaggattggaactggaccttgcttattggaaaggtgcgacacgataaggggggaaactcagtaggaacaacgggctcattcctgatcagaagagaaaaaaacaggatttctttcacctgcacccggtaataatattttc…
P6	AFLA_030930	1024	ttatgactattttcttttttagggtcagctgagcagggacaagagggcctagacataaaaagacgcaaaggacagaaagatgccgaacgagttggaaaggaaagaacgggtacggggatgagatctccgccgatttccccgatgtttggctatagcacgaaagaaatacggagagggaatgggtcaatcttttagcaggaggggagaaccccagattcgcgcaacaacaacatcacaattcaaatttgtcatgttgtgtttatgaaccggttaatgagggtatccagaacgggggttgaaggtggatctcatacaggagaattattatctattttctaatttctacactgcatgaatggcatgtcataggtgtttcgggtccatggaagaagagaaggt…

## Sheet: Table S3
Table S3. Median of ranks and expression rank of top 13 genes in Table 1 evaluated from 83, 75 and 8 transcriptome datasets.
		Median of ranks1				Expression rank by median1
Gene	Promoters tested in this study	GSE15435 + GSE136041 (83)	GSE15435 (75)	GSE136041 (8)		GSE15435 + GSE136041 (83)	GSE15435 (75)	GSE136041 (8)
AFLA_090780	ü	5	5	5		1	1	1
AFLA_064900		12	10	5072		2	2	5031
AFLA_025100	ü	12	10	236		2	2	177
AFLA_014570	ü	12	11	116		2	4	71
AFLA_050690		16	14	83		5	5	48
AFLA_113120	ü	18	17	136		6	8	96
AFLA_048690		18	16	252		6	7	192
AFLA_063260		19	19	34		8	9	11
AFLA_083050		21	21	39		9	10	15
AFLA_052860	ü	32	15	187		10	6	132
AFLA_047870		34	30	65		11	11	34
AFLA_006300		34	33	104		11	12	62
AFLA_030930	ü	34	33	52		11	12	25
1Numbers in parentheses are the total numbers of transcriptome datasets used for the evaluation.

## Sheet: Table S4
Table S4. Primers for construction of transformants.
Primer	Sequence
ustR.5F	TAACCATCAACTTACTCACGACCC
ustR.5R	atctggtagacaagcactgaCTGGGAAAAGATCGAGCTGC
pyrG.F	TCAGTGCTTGTCTACCAGAT
pyrG.R	GAATTCGATACCTGTCGAAAG
ustR.3F	ATGTCAGGGGCCCAGCGG
ustR.3R	AGCTGGCCAGCAGCATTGCCT
p01.F	tttcgacaggtatcgaattcGTAGATTGTCACCGCTCAGG
p01.R	cgccgctgggcccctgacatTTTGAAGGTGGTGCGAACTTT
p02.F	tttcgacaggtatcgaattcAAAAGAATAAACAATGGTAA
p02.R	cgccgctgggcccctgacatTGTTTAGATGTGTCTGTTGG
p03.F	tttcgacaggtatcgaattcTTTGACCCTTTTGAATTTCT
p03.R	cgccgctgggcccctgacatATTGTTATGTTGATTTGTAT
p04.F	tttcgacaggtatcgaattcTGACAGCAATGGACTTGGAT
p04.R	cgccgctgggcccctgacatGTTTGCGAGTGGTTTGGTAA
p05.F	tttcgacaggtatcgaattcAGAACTACGCGGTGGTAGAT
p05.R	cgccgctgggcccctgacatTGTTATGTGATTTCTTCTAA
p06.F	tttcgacaggtatcgaattcTTATGACTATTTTCTTTTTT
p06.R	cgccgctgggcccctgacatTGTGATAGTTGAAAGATTCG
p07.F	tttcgacaggtatcgaattcCTTTAGAGATAAGGTTTGAT
p07.R	cgccgctgggcccctgacatATTGATGGTTGATTAAAGAG
chk.F	TACTCCGTAAGTAATGCTCG
chk.R	TGTCCGTCTTCATTACACTTC
